# Supplementary material for: Mn(OAc)3-mediated synthesis of β-hydroxyphosphonates from P(O)–H compounds and alkenes
Source: Royal Society of Chemistry journal article supplement (doi:10.1039/c4ra10593a), 2014-10-08

## Electronic Supplementary Information for

# Mn(OAc)<sub>3</sub>-Mediated Synthesis of $\beta$ -Hydroxyphosphonates from P(O)-H Compounds and Alkenes

Yuzhen Gao,<sup>a</sup> Ju Wu,<sup>a</sup> Jian Xu,<sup>a</sup> Pengbo Zhang,<sup>a</sup> Guo Tang,<sup>a,\*</sup> and Yufen Zhao<sup>a,b</sup>

<sup>a</sup> Department of Chemistry, College of Chemistry and Chemical Engineering, and the Key Laboratory for Chemical Biology of Fujian Province, Xiamen University, Xiamen, Fujian 361005, China

Fax: (86)592-2185780; E-mail: t12g21@xmu.edu.cn

<sup>b</sup> Key Laboratory of Bioorganic Phosphorus Chemistry and Chemical Biology (Ministry of Education), Department of Chemistry, Tsinghua University, Beijing 100084, China

### Table of Contents

|                                                                                           |            |
|-------------------------------------------------------------------------------------------|------------|
| General and Experimental Section                                                          | Page 2     |
| Spectral Data                                                                             | Page 3-10  |
| <sup>31</sup> P NMR, <sup>1</sup> H NMR and <sup>13</sup> C NMR spectra for all compounds | Page 11-39 |

## General and Experimental Section

### General

All reactions were carried out under N<sub>2</sub>. Unless otherwise noted, all reagents were obtained from commercial suppliers and used without further purification. <sup>1</sup>H NMR (400 MHz) and <sup>13</sup>C NMR (100 MHz) spectra were measured on Bruker AVIII 400M spectrometers with CDCl<sub>3</sub> as solvent and tetramethylsilane (TMS) as internal standard or 85% H<sub>3</sub>PO<sub>4</sub> as external standard for <sup>31</sup>P NMR (162 MHz). Chemical shifts were reported in units (ppm) by assigning TMS resonance in the <sup>1</sup>H spectrum as 0.00 ppm and CDCl<sub>3</sub> resonance in the <sup>13</sup>C spectrum as 77.23 ppm. All coupling constants (*J* values) were reported in Hertz (Hz). Chemical shifts of common trace <sup>1</sup>H NMR impurities (ppm): H<sub>2</sub>O: 1.56, CHCl<sub>3</sub>: 7.26. Column chromatography was performed on silica gel 300-400 mesh. The CAS number of the known compound was listed. The unknown products were further characterized by HRMS-ESI.

### Typical procedure for the synthesis of β-hydroxyphosphonates:

An oven-dried Schlenk tube containing Mn(OAc)<sub>3</sub>·2H<sub>2</sub>O (1.5 mmol) was evacuated and purged with nitrogen three times. Alkene (0.50 mmol), *H*-phosphonate (1.0 mmol) and CH<sub>3</sub>COOH (3 mL) were sequentially added to the system at room temperature. The reaction mixture was heated with stirring at 80 °C for 8 hours. The reaction solution was concentrated in vacuo and then added 15 mL saturated sodium bicarbonate solution and extracted with EtOAc (3×10 mL). The combined organic layer was concentrated in vacuo, and then added 2 mL of 1 M NaOH (in CH<sub>3</sub>OH) solution. The mixture was stirred at room temperature for 1 hour, and then neutralized by 1 M hydrochloric acid. The solution was extracted with EtOAc (3×10 mL). The combined organic layer was dried over MgSO<sub>4</sub>, filtered and concentrated in vacuo. The residue was purified by silica gel column chromatography using petroleum ether–AcOEt (3:1-1:1, v/v) as the eluent to give the corresponding β-hydroxyphosphonates.

## Spectral Data

2-(Diisopropoxyphosphoryl)-1-phenylethyl acetate (**3a**) (CAS no: 54051-30-8).

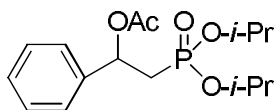

Colourless oil; 143 mg, 87% yield.  $^1\text{H}$  NMR (400 MHz,  $\text{CDCl}_3$ ):  $\delta$  (ppm) 7.32 – 7.20 (m, 5H), 6.05 (m, 1H), 4.60 (m, 2H), 2.44 (m, 1H), 2.18 (m, 1H), 2.00 (s, 1H), 2.31 (s, 3H), 1.25 – 1.15 (m, 12H).  $^{13}\text{C}$  NMR (100 MHz,  $\text{CDCl}_3$ ):  $\delta$  (ppm) 169.5 (s), 140.1 (d,  $J = 10.8$  Hz), 128.5 (s), 128.3 (s), 126.6 (s), 70.9 (d,  $J = 1.8$  Hz), 70.5 (d,  $J = 6.7$  Hz), 70.4 (d,  $J = 6.6$  Hz), 34.5 (d,  $J = 141.6$  Hz), 23.96 (d,  $J = 3.7$  Hz), 23.8 (t,  $J = 5.1$  Hz), 21.1 (s).  $^{31}\text{P}$  NMR (162 MHz,  $\text{CDCl}_3$ ):  $\delta$  (ppm) 23.4. MS-ESI:  $m/z$  351.1 ( $[\text{M}+\text{Na}]^+$ ).

2-(Diisopropoxyphosphoryl)-1-phenylethyl propionate (**3b**).

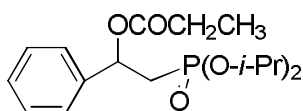

Colourless oil; 125 mg, 73% yield.  $^1\text{H}$  NMR (400 MHz,  $\text{CDCl}_3$ ):  $\delta$  (ppm) 7.38 – 7.27 (m, 5H), 6.09 (m, 1H), 4.65 (m, 2H), 2.52 – 2.19 (m, 4H), 1.30 – 1.21 (m, 12H), 1.12 (t,  $J = 7.5$  Hz, 3H).  $^{13}\text{C}$  NMR (100 MHz,  $\text{CDCl}_3$ ):  $\delta$  (ppm) 173.1 (s), 140.4 (d,  $J = 10.5$  Hz), 128.6 (s), 128.4 (s), 126.67 (s), 71.0 (d,  $J = 1.8$  Hz), 70.6 (d,  $J = 6.5$  Hz), 70.45 (d,  $J = 6.7$  Hz), 34.9 (d,  $J = 141.2$  Hz), 27.8 (s), 24.13 (d,  $J = 3.6$  Hz), 24.0 (t,  $J = 4.1$  Hz), 9.0 (s).  $^{31}\text{P}$  NMR (162 MHz,  $\text{CDCl}_3$ ):  $\delta$  (ppm) 23.5. HRMS-ESI:  $m/z$  found 365.1490 ( $[\text{M}+\text{Na}]^+$ ,  $\text{C}_{17}\text{H}_{27}\text{NaO}_5\text{P}^+$  calcd. 365.1494).

Diisopropyl (2-hydroxy-2-phenylethyl)phosphonate (**4a**) (CAS no: 72019-17-1).

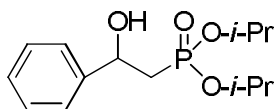

Light yellow solid; 124 mg, 87% yield.  $^1\text{H}$  NMR (400 MHz,  $\text{CDCl}_3$ ):  $\delta$  (ppm) 7.40 – 7.26 (m, 5H), 5.09 (m, 1H), 4.83 – 4.66 (m, 2H), 2.16 (m, 2H), 1.38 – 1.28 (m, 12H).  $^{13}\text{C}$  NMR (100 MHz,  $\text{CDCl}_3$ ):  $\delta$  (ppm) 143.8 (d,  $J = 15.7$  Hz), 128.4 (s), 127.6 (s), 125.6 (s), 70.8 (d,  $J = 6.5$  Hz), 70.7 (d,  $J = 6.8$  Hz), 68.8 (d,  $J = 4.4$  Hz), 37.8 (d,  $J = 137.3$  Hz), 24.0 (t,  $J = 3.5$  Hz), 23.88 (d,  $J = 4.8$  Hz).  $^{31}\text{P}$  NMR (162 MHz,  $\text{CDCl}_3$ ):  $\delta$  (ppm) 27.0. MS-ESI:  $m/z$  309.1 ( $[\text{M}+\text{Na}]^+$ ).

Diisopropyl (2-hydroxy-2-(p-tolyl)ethyl)phosphonate (**4b**).

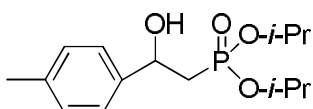

White solid; 135 mg, 90% yield, m.p. 97.1-98.5 °C.  $^1\text{H}$  NMR (400 MHz,  $\text{CDCl}_3$ ):  $\delta$  (ppm) 7.28 – 7.26 (d,  $J = 8.0$  Hz, 2H), 7.15 – 7.13 (d,  $J = 8.0$  Hz, 2H), 5.03 (m, 1H), 4.70 (m, 2H), 2.32 (s, 3H), 2.13 (m, 2H), 1.34 – 1.26 (m, 12H).  $^{13}\text{C}$  NMR (100 MHz,  $\text{CDCl}_3$ ):  $\delta$  (ppm) 140.8 (d,  $J = 16.3$  Hz), 137.2 (s), 129.1 (s), 125.5 (s), 70.8 (d,  $J = 6.5$  Hz), 70.6 (d,  $J = 6.8$  Hz), 68.65 (d,  $J = 4.4$  Hz), 37.3 (d,  $J = 136.5$  Hz), 24.1 (t,  $J = 3.8$  Hz), 23.9 (d,  $J = 4.8$  Hz), 21.1 (s).  $^{31}\text{P}$  NMR (162 MHz,  $\text{CDCl}_3$ ):  $\delta$  (ppm) 27.3. HRMS-ESI:  $m/z$  323.1383 ( $[\text{M}+\text{Na}]^+$ ,  $\text{C}_{15}\text{H}_{25}\text{NaO}_4\text{P}^+$  calcd. 323.1388).

*Diisopropyl (2-hydroxy-2-(4-isobutylphenyl)ethyl)phosphonate (4c).*

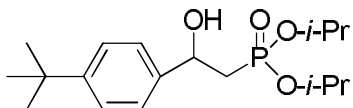

White solid; 137 mg, 80% yield, m.p. 95.0-96.2 °C. <sup>1</sup>H NMR (400 MHz, CDCl<sub>3</sub>): δ (ppm) 7.37 – 7.30 (q, 4H, *J* = 8.5 Hz), 5.06 (m, 1H), 4.76 – 4.63 (m, 2H), 2.25 – 2.09 (m, 2H), 1.33 – 1.29 (m, 18H), 1.26 – 1.24 (d, 3H, *J* = 6.3 Hz). <sup>13</sup>C NMR (100 MHz, CDCl<sub>3</sub>): δ (ppm) 150.6 (s), 140.8 (d, *J* = 15.8 Hz), 125.4 (s), 70.85 (d, *J* = 6.5 Hz), 70.74 (d, *J* = 6.9 Hz), 68.7 (d, *J* = 4.4 Hz), 37.1 (d, *J* = 136.9 Hz), 34.6 (s), 31.4 (s), 24.1 (t, *J* = 3.7 Hz), 23.95 (d, *J* = 4.7 Hz). <sup>31</sup>P NMR (162 MHz, CDCl<sub>3</sub>): δ (ppm) 27.0. HRMS-ESI: *m/z* found 365.1856 ([M+Na]<sup>+</sup>, C<sub>18</sub>H<sub>31</sub>NaO<sub>4</sub>P<sup>+</sup> calcd. 365.1858).

*Diisopropyl (2-([1,1'-biphenyl]-4-yl)-2-hydroxyethyl)phosphonate (4d).*

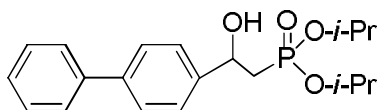

White solid; 100 mg, 55% yield, m.p. 78.2-79.0 °C. <sup>1</sup>H NMR (400 MHz, CDCl<sub>3</sub>): δ (ppm) 7.58 – 7.56 (d, 4H, *J* = 7.9 Hz), 7.47 – 7.41 (m, 4H), 7.32 (m, 1H), 5.14 (m, 1H), 4.81 – 4.65 (m, 2H), 2.24 – 2.18 (m, 2H), 1.36 – 1.27 (m, 12H). <sup>13</sup>C NMR (100 MHz, CDCl<sub>3</sub>): δ (ppm) 142.8 (d, *J* = 16.6 Hz), 141.0 (s), 140.7 (s), 128.9 (s), 127.41 (s), 127.36 (s), 127.2 (s), 126.2 (s), 70.17 (d, *J* = 6.3 Hz), 70.05 (d, *J* = 6.8 Hz), 68.75 (d, *J* = 4.6 Hz), 37.3 (d, *J* = 138.1 Hz), 24.2 (t, *J* = 2.8 Hz), 24.03 (d, *J* = 4.6 Hz). <sup>31</sup>P NMR (162 MHz, CDCl<sub>3</sub>): δ (ppm) 27.2. HRMS-ESI: *m/z* found 385.1545 ([M+Na]<sup>+</sup>, C<sub>20</sub>H<sub>27</sub>NaO<sub>4</sub>P<sup>+</sup> calcd. 385.1545).

*Diisopropyl (2-hydroxy-2-(4-methoxyphenyl)ethyl)phosphonate (4e).*

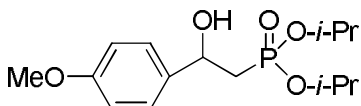

Yellow oil; 111 mg, 70% yield. <sup>1</sup>H NMR (400 MHz, CDCl<sub>3</sub>): δ (ppm) 7.31 (d, 2H, *J* = 8.7 Hz), 6.88 (d, 2H, *J* = 8.7 Hz), 5.05 (m, 1H), 4.81 – 4.67 (m, 2H), 3.81 (s, 3H), 2.18 – 2.11 (m, 2H), 1.38 – 1.29 (m, 12H). <sup>13</sup>C NMR (100 MHz, CDCl<sub>3</sub>): δ (ppm) 159.3 (s), 135.95 (d, *J* = 17.1 Hz), 127.0 (s), 127.6 (s), 114.0 (s), 71.05 (d, *J* = 6.6 Hz), 70.95 (d, *J* = 6.9 Hz), 68.64 (d, *J* = 4.7 Hz), 55.5 (s), 37.4 (d, *J* = 136.1 Hz), 24.2 (t, *J* = 4.3 Hz), 24.12 (d, *J* = 4.6 Hz). <sup>31</sup>P NMR (162 MHz, CDCl<sub>3</sub>): δ (ppm) 27.5. HRMS-ESI: *m/z* found 339.1336 ([M+Na]<sup>+</sup>, C<sub>15</sub>H<sub>25</sub>NaO<sub>5</sub>P<sup>+</sup> calcd. 339.1337).

*Diisopropyl (2-hydroxy-2-(naphthalen-2-yl)ethyl)phosphonate (4f).*

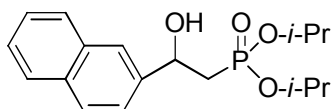

White solid; 118 mg, 70% yield, m.p. 77.4-78.5 °C. <sup>1</sup>H NMR (400 MHz, CDCl<sub>3</sub>): δ (ppm) 7.87 (s, 1H), 7.84 – 7.82 (m, 3H), 7.51 – 7.44 (m, 3H), 5.27 (m, 1H), 4.79 – 4.65 (m, 2H), 2.28 – 2.22 (m, 2H), 1.36 – 1.24 (m, 12H). <sup>13</sup>C NMR (100 MHz, CDCl<sub>3</sub>): δ (ppm) 141.2 (d, *J* = 15.7 Hz), 133.4 (s), 133.0 (s), 128.3 (s), 128.1 (s), 127.7 (s), 126.2 (s), 125.9 (s), 124.3 (s), 123.8 (s), 71.0 (d, *J* = 6.6 Hz), 70.85 (d, *J* = 6.7 Hz), 69.03 (d, *J* = 4.5 Hz), 37.3 (d, *J* = 137.5 Hz), 24.1 (t, *J* = 3.4 Hz), 23.95 (d, *J* = 4.7 Hz). <sup>31</sup>P NMR (162 MHz, CDCl<sub>3</sub>): δ (ppm) 27.2. HRMS-ESI: *m/z* found 359.1387 ([M+Na]<sup>+</sup>, C<sub>18</sub>H<sub>25</sub>NaO<sub>4</sub>P<sup>+</sup> calcd. 359.1388).

*Diisopropyl (2-(4-bromophenyl)-2-hydroxyethyl)phosphonate (4g).*

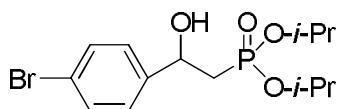

Light yellow solid; 151 mg, 83% yield, m.p. 71.1-72.5 °C. <sup>1</sup>H NMR (400 MHz, CDCl<sub>3</sub>): δ (ppm) 7.45 (d, 2H, *J* = 8.4 Hz), 7.26 (d, 2H, *J* = 8.4 Hz), 5.03 (m, 1H), 4.77 – 4.64 (m, 2H), 2.14 – 2.08 (m, 2H), 1.34 – 1.26 (m, 12H). <sup>13</sup>C NMR (100 MHz, CDCl<sub>3</sub>): δ (ppm) 142.9 (d, *J* = 16.2 Hz), 131.6 (s), 127.5 (s), 121.4 (s), 71.14 (d, *J* = 6.6 Hz), 70.0 (d, *J* = 6.9 Hz), 68.33 (d, *J* = 4.3 Hz), 37.2 (d, *J* = 137.1 Hz), 24.1 (t, *J* = 3.6 Hz), 23.97 (d, *J* = 4.8 Hz). <sup>31</sup>P NMR (162 MHz, CDCl<sub>3</sub>): δ (ppm) 26.6. HRMS-ESI: *m/z* found 387.0337 ([M+Na]<sup>+</sup>, C<sub>14</sub>H<sub>22</sub>BrNaO<sub>4</sub>P<sup>+</sup> calcd. 387.0337).

*Diisopropyl (2-(4-chlorophenyl)-2-hydroxyethyl)phosphonate (4h).*

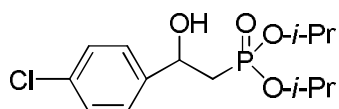

Light yellow solid; 134 mg, 84% yield, m.p. 66.6-67.7 °C. <sup>1</sup>H NMR (400 MHz, CDCl<sub>3</sub>): δ (ppm) 7.34 – 7.28 (m, 4H), 5.04 (m, 1H), 4.74 – 4.62 (m, 2H), 2.19 – 2.02 (m, 2H), 1.33 – 1.25 (m, 12H). <sup>13</sup>C NMR (100 MHz, CDCl<sub>3</sub>): δ (ppm) 142.48 (d, *J* = 15.7 Hz), 133.1 (s), 128.5 (s), 127.1 (s), 70.96 (d, *J* = 6.5 Hz), 70.8 (d, *J* = 6.8 Hz), 68.24 (d, *J* = 4.0 Hz), 37.2 (d, *J* = 138.2 Hz), 24.0 (t, *J* = 3.8 Hz), 23.88 (d, *J* = 4.8 Hz). <sup>31</sup>P NMR (162 MHz, CDCl<sub>3</sub>): δ (ppm) 26.5. HRMS-ESI: *m/z* found 343.0842 ([M+Na]<sup>+</sup>, C<sub>14</sub>H<sub>22</sub>ClNaO<sub>4</sub>P<sup>+</sup> calcd. 343.0842).

*Diisopropyl (2-(4-cyanophenyl)-2-hydroxyethyl)phosphonate (4i).*

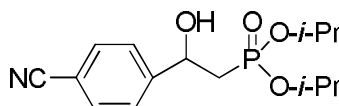

Yellow oil; 39 mg, 25% yield. <sup>1</sup>H NMR (400 MHz, CDCl<sub>3</sub>): δ (ppm) 7.66 (d, 2H, *J* = 8.1 Hz), 7.53 (d, 2H, *J* = 8.1 Hz), 5.12 (m, 1H), 4.82 – 4.66 (m, 2H), 2.19 – 2.05 (m, 2H), 1.39 – 1.27 (m, 12H). <sup>13</sup>C NMR (100 MHz, CDCl<sub>3</sub>): δ (ppm) 149.1 (d, *J* = 16.9 Hz), 132.5 (s), 126.5 (s), 118.9 (s), 111.6 (s), 71.46 (d, *J* = 6.5 Hz), 71.33 (d, *J* = 6.9 Hz), 68.44 (d, *J* = 4.7 Hz), 37.1 (d, *J* = 137.7 Hz), 24.2 (t, *J* = 5.2 Hz), 23.09 (d, *J* = 4.8 Hz). <sup>31</sup>P NMR (162 MHz, CDCl<sub>3</sub>): δ (ppm) 26.5. HRMS-ESI: *m/z* found 334.1182 ([M+Na]<sup>+</sup>, C<sub>15</sub>H<sub>22</sub>NNaO<sub>4</sub>P<sup>+</sup> calcd. 334.1184).

*Diisopropyl (2-hydroxy-2-(3-nitrophenyl)ethyl)phosphonate (4j).*

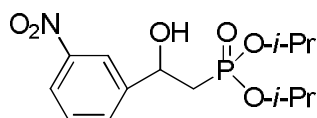

Light yellow solid; 55 mg, 33% yield, m.p. 55.4-56.1 °C. <sup>1</sup>H NMR (400 MHz, CDCl<sub>3</sub>): δ (ppm) 8.26 (s, 1H), 8.12 (m, 1H), 7.74 (d, 1H *J* = 7.73 Hz), 7.52 (t, 1H *J* = 7.93 Hz), 4.79 – 4.65 (m, 3H), 2.19 – 2.10 (m, 2H), 1.36 – 1.24 (m, 12H). <sup>13</sup>C NMR (100 MHz, CDCl<sub>3</sub>): δ (ppm) 148.5 (s), 146.1 (d, *J* = 16.4 Hz), 132.0 (s), 129.6 (s), 122.7 (s), 120.9 (s), 71.4 (d, *J* = 6.4 Hz), 71.25 (d, *J* = 6.8 Hz), 68.2 (d, *J* = 4.4 Hz), 37.1 (d, *J* = 137.8 Hz), 24.14 (m), 24.02 (d, *J* = 4.4 Hz). <sup>31</sup>P NMR (162 MHz, CDCl<sub>3</sub>): δ (ppm) 26.3. HRMS-ESI: *m/z* found 354.1080 ([M+Na]<sup>+</sup>, C<sub>14</sub>H<sub>22</sub>NNaO<sub>6</sub>P<sup>+</sup> calcd. 354.1082).

Diisopropyl (2-hydroxy-2-(thiophen-2-yl)ethyl)phosphonate (**4k**).

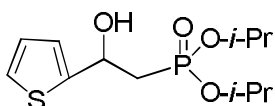

Light yellow solid; 85 mg, 58% yield, m.p.64.3-65.6 °C. <sup>1</sup>H NMR (400 MHz, CDCl<sub>3</sub>): δ (ppm) 7.2 (m, 1H), 6.97 – 6.93 (m, 2H), 5.33 (m, 1H), 4.77 – 4.65 (m, 2H), 2.32 – 2.26 (m, 2H), 1.34 – 1.28 (m, 12H). <sup>13</sup>C NMR (100 MHz, CDCl<sub>3</sub>): δ (ppm) 147.9 (d, *J* = 18.6 Hz), 126.6 (s), 124.6 (s), 123.4 (s), 71.1 (d, *J* = 6.5 Hz), 70.9 (d, *J* = 6.8 Hz), 65.3 (d, *J* = 3.5 Hz), 37.4 (d, *J* = 138.1 Hz), 24.1 (m), 23.93 (d, *J* = 4.8 Hz). <sup>31</sup>P NMR (162 MHz, CDCl<sub>3</sub>): δ (ppm) 26.2. HRMS-ESI: *m/z* found 315.0790 ([M+Na]<sup>+</sup>, C<sub>12</sub>H<sub>21</sub>NaO<sub>4</sub>PS<sup>+</sup> calcd. 315.0796).

Diisopropyl (2-hydroxy-2-phenylpropyl)phosphonate (**4l**)(CAS no: 1334049-23-8).

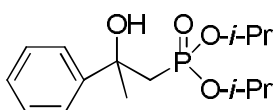

Yellow oil; 90 mg, 60% yield. <sup>1</sup>H NMR (400 MHz, CDCl<sub>3</sub>): δ (ppm) 7.46 (m, 2H), 7.32 (m, 2H), 7.22 (m, 1H), 4.72 – 4.62 (m, 1H), 4.30 (m, 1H), 2.46 – 2.25 (m, 2H), 1.62 (d, 3H, *J* = 2.2 Hz), 1.32 (t, 6H, *J* = 6.3 Hz), 1.17 (d, 3H, *J* = 6.1 Hz), 0.86 (d, 3H, *J* = 6.2 Hz). <sup>13</sup>C NMR (100 MHz, CDCl<sub>3</sub>): δ (ppm) 147.45 (d, *J* = 8.1 Hz), 128.1 (s), 126.7 (s), 124.8 (s), 72.13 (d, *J* = 5.0 Hz), 70.8 (d, *J* = 6.7 Hz), 70.65 (d, *J* = 6.7 Hz), 40.9 (d, *J* = 136.4 Hz), 32.4 (d, *J* = 13.3 Hz), 24.06 (m), 23.43 (d, *J* = 5.8 Hz). <sup>31</sup>P NMR (162 MHz, CDCl<sub>3</sub>): δ (ppm) 27.1. MS-ESI: *m/z* 323.1 ([M+Na]<sup>+</sup>).

Diisopropyl (1-hydroxy-2,3-dihydro-1H-inden-2-yl)phosphonate (**4m**).

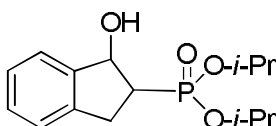

Yellow oil; 101 mg, 68% yield. <sup>1</sup>H NMR (400 MHz, CDCl<sub>3</sub>): δ (ppm) 7.40 (m, 1H), 7.23 – 7.15 (m, 3H), 5.44 (m, 1H), 4.75 – 4.67 (m, 2H), 3.6 (m, 1H), 3.03 (m, 1H), 2.50 (m, 1H), 1.32 – 1.24 (m, 12H). <sup>13</sup>C NMR (100 MHz, CDCl<sub>3</sub>): δ (ppm) 143.8 (d, *J* = 13.8 Hz), 140.36 (d, *J* = 11.9 Hz), 128.2 (s), 127.0 (s), 124.45 (s), 124.41 (s), 76.2 (s), 70.55 (d, *J* = 6.6 Hz), 43.5 (d, *J* = 146.6 Hz), 31.6 (s), 24.1 (t, *J* = 3.4 Hz), 24.0 (t, *J* = 4.3 Hz). <sup>31</sup>P NMR (162 MHz, CDCl<sub>3</sub>): δ (ppm) 29.4. HRMS-ESI: *m/z* found 321.1236 ([M+Na]<sup>+</sup>, C<sub>15</sub>H<sub>23</sub>NaO<sub>4</sub>P<sup>+</sup> calcd. 321.1232).

Diisopropyl (2-hydroxy-3-phenylpropyl)phosphonate (**4n**).

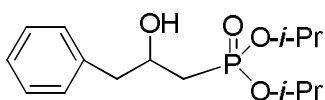

Colourless oil; 62 mg, 41% yield. <sup>1</sup>H NMR (400 MHz, CDCl<sub>3</sub>): δ (ppm) 7.30 (m, 2H), 7.21 (m, 3H), 4.73 – 4.66 (m, 2H), 4.22 (m, 1H), 2.92 (m, 1H), 2.76 (m, 1H), 1.98 – 1.81 (m, 2H), 1.31 – 1.27 (m, 12H). <sup>13</sup>C NMR (100 MHz, CDCl<sub>3</sub>): δ (ppm) 137.9 (s), 129.6 (s), 128.5 (s), 126.6 (s), 70.8 (d, *J* = 2.1 Hz), 70.74 (d, *J* = 2.4 Hz), 68.87 (d, *J* = 4.9 Hz), 44.46 (d, *J* = 16.9 Hz), 34.0 (d, *J* = 139.7 Hz), 24.13 (d, *J* = 3.6 Hz), 24.05 (d, *J* = 4.0 Hz). <sup>31</sup>P NMR (162 MHz, CDCl<sub>3</sub>): δ (ppm) 28.2. HRMS-ESI: *m/z* found 323.1383 ([M+Na]<sup>+</sup>, C<sub>15</sub>H<sub>25</sub>NaO<sub>4</sub>P<sup>+</sup> calcd. 323.1388).

*Diisopropyl (2-hydroxyoctyl)phosphonate (4o).*

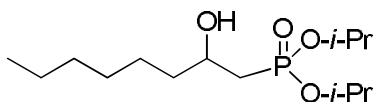

Colourless oil; 46 mg, 31% yield.  $^1\text{H}$  NMR (400 MHz,  $\text{CDCl}_3$ ):  $\delta$  (ppm) 4.70 (m, 2H), 3.94 (m, 1H), 1.95 – 1.75 (m, 2H), 1.59 – 1.53 (m, 1H), 1.48 – 1.40 (m, 2H), 1.34 – 1.24 (m, 19H), 0.88 – 0.84 (t, 3H,  $J = 6.5$  Hz).  $^{13}\text{C}$  NMR (100 MHz,  $\text{CDCl}_3$ ):  $\delta$  (ppm) 70.75 (d,  $J = 2.0$  Hz), 70.69 (d,  $J = 2.4$  Hz), 66.69 (d,  $J = 5.7$  Hz), 38.34 (d,  $J = 17.0$  Hz), 34.8 (d,  $J = 138.8$  Hz), 31.9 (s), 29.3 (s), 25.5 (s), 24.2 (d,  $J = 3.6$  Hz), 24.13 (d,  $J = 4.8$  Hz), 22.7 (s), 14.2 (s).  $^{31}\text{P}$  NMR (162 MHz,  $\text{CDCl}_3$ ):  $\delta$  (ppm) 28.8. HRMS-ESI:  $m/z$  found 317.1852 ( $[\text{M}+\text{Na}]^+$ ,  $\text{C}_{14}\text{H}_{31}\text{NaO}_4\text{P}^+$  calcd. 317.1858).

*Diisopropyl (2-hydroxyhexyl)phosphonate (4p).*

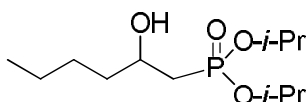

Colourless oil; 35 mg, 26% yield.  $^1\text{H}$  NMR (400 MHz,  $\text{CDCl}_3$ ):  $\delta$  (ppm) 4.77 – 4.66 (m, 2H), 3.95 (m, 1H), 1.96 – 1.78 (m, 2H), 1.58 – 1.54 (m, 1H), 1.49 – 1.31 (m, 17H), 0.91 – 0.88 (t, 3H,  $J = 6.9$  Hz).  $^{13}\text{C}$  NMR (100 MHz,  $\text{CDCl}_3$ ):  $\delta$  (ppm) 70.81 (d,  $J = 2.0$  Hz), 70.76 (d,  $J = 2.2$  Hz), 66.73 (d,  $J = 5.7$  Hz), 38.1 (d,  $J = 11.4$  Hz), 34.8 (d,  $J = 138.9$  Hz), 27.7 (s), 24.2 (d,  $J = 3.5$  Hz), 24.15 (d,  $J = 4.8$  Hz), 22.7 (s), 14.2 (s).  $^{31}\text{P}$  NMR (162 MHz,  $\text{CDCl}_3$ ):  $\delta$  (ppm) 28.8. HRMS-ESI:  $m/z$  found 289.1542 ( $[\text{M}+\text{Na}]^+$ ,  $\text{C}_{12}\text{H}_{27}\text{NaO}_4\text{P}^+$  calcd. 289.1545).

*Diethyl (2-hydroxy-2-phenylethyl)phosphonate (4q) (CAS no: 72019-14-8).*

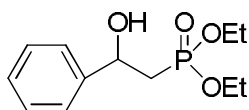

White solid; 103 mg, 80% yield.  $^1\text{H}$  NMR (400 MHz,  $\text{CDCl}_3$ ):  $\delta$  (ppm) 7.39 – 7.23 (m, 5H), 5.09 (m, 1H), 4.10 – 4.00 (m, 2H), 2.20 (m, 2H), 1.28 (m, 6H).  $^{13}\text{C}$  NMR (100 MHz,  $\text{CDCl}_3$ ):  $\delta$  (ppm) 143.85 (d,  $J = 15.0$  Hz), 128.5 (s), 127.7 (s), 125.6 (s), 68.78 (d,  $J = 4.2$  Hz), 62.07 (d,  $J = 6.3$  Hz), 61.9 (d,  $J = 6.6$  Hz), 36.0 (d,  $J = 136.7$  Hz), 16.4 (t,  $J = 5.6$  Hz).  $^{31}\text{P}$  NMR (162 MHz,  $\text{CDCl}_3$ ):  $\delta$  (ppm) 29.1. MS-ESI:  $m/z$  281.0 ( $[\text{M}+\text{Na}]^+$ ).

*Dipropyl (2-hydroxy-2-(p-tolyl)ethyl)phosphonate (4r).*

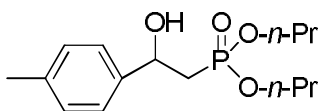

Colourless oil; 123 mg, 82% yield.  $^1\text{H}$  NMR (400 MHz,  $\text{CDCl}_3$ ):  $\delta$  (ppm) 7.26 (m, 2H), 7.13 (m, 2H), 5.05 (m, 1H), 3.95 (m, 4H), 2.32 (s), 2.20 (m, 2H), 1.65 (m, 4H), 0.93 (m, 6H).  $^{13}\text{C}$  NMR (100 MHz,  $\text{CDCl}_3$ ):  $\delta$  (ppm) 140.9 (d,  $J = 15.5$  Hz), 137.2 (s), 129.1 (s), 125.5 (s), 68.63 (d,  $J = 4.1$  Hz), 67.48 (d,  $J = 6.5$  Hz), 67.3 (d,  $J = 7.2$  Hz), 35.9 (d,  $J = 136.0$  Hz), 23.8 (t,  $J = 5.5$  Hz), 21.1 (s), 10.0 (s).  $^{31}\text{P}$  NMR (162 MHz,  $\text{CDCl}_3$ ):  $\delta$  (ppm) 28.4. HRMS-ESI:  $m/z$  found 323.1383 ( $[\text{M}+\text{Na}]^+$ ,  $\text{C}_{15}\text{H}_{25}\text{NaO}_4\text{P}^+$  calcd. 323.1388).

*Dibutyl (2-hydroxy-2-(p-tolyl)ethyl)phosphonate (4s).*

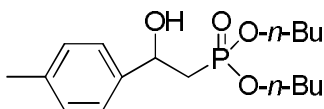

Colourless oil; 120 mg, 73% yield.  $^1\text{H}$  NMR (400 MHz,  $\text{CDCl}_3$ ):  $\delta$  (ppm) 7.26 (d, 2H,  $J = 8.0$  Hz), 7.16 (d, 2H,  $J = 8.0$  Hz), 5.06 (m, 1H), 4.06 – 4.00 (m, 4H), 2.33 (s), 2.28 – 2.10 (m, 2H), 1.64 (m, 4H), 1.40 (m, 4H), 0.93 (q, 6H,  $J = 7.4$  Hz).  $^{13}\text{C}$  NMR (100 MHz,  $\text{CDCl}_3$ ):  $\delta$  (ppm) 140.8 (d,  $J = 15.7$  Hz), 137.5 (s), 129.3 (s), 125.6 (s), 68.8 (d,  $J = 4.4$  Hz), 65.9 (d,  $J = 6.5$  Hz), 65.8 (d,  $J = 7.0$  Hz), 35.9 (d,  $J = 135.8$  Hz), 32.6 (t,  $J = 6.0$  Hz), 21.2 (s), 18.86 (d,  $J = 2.2$  Hz), 13.7 (s).  $^{31}\text{P}$  NMR (162 MHz,  $\text{CDCl}_3$ ):  $\delta$  (ppm) 28.5. HRMS-ESI:  $m/z$  found 351.1696 ( $[\text{M}+\text{Na}]^+$ ,  $\text{C}_{17}\text{H}_{29}\text{NaO}_4\text{P}^+$  calcd. 351.1701).

*Dibenzyl (2-hydroxy-2-(p-tolyl)ethyl)phosphonate (4t).*

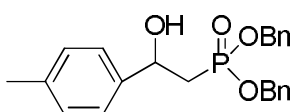

White solid; 91 mg, 46% yield, m.p. 79.2-80.2 °C.  $^1\text{H}$  NMR (400 MHz,  $\text{CDCl}_3$ ):  $\delta$  (ppm) 7.36 (m, 10H), 7.22 (d, 2H,  $J = 7.9$  Hz), 7.16 (d, 2H,  $J = 8.0$  Hz), 5.14 – 4.97 (m, 5H), 2.34 (s, 3H), 2.32 – 2.07 (m, 2H).  $^{13}\text{C}$  NMR (100 MHz,  $\text{CDCl}_3$ ):  $\delta$  (ppm) 140.6 (d,  $J = 16.0$  Hz), 137.6 (s), 136.6 (d,  $J = 6.1$  Hz), 129.3 (s), 128.8 (d,  $J = 3.9$  Hz), 128.7 (d,  $J = 5.9$  Hz), 128.18 (d,  $J = 3.6$  Hz), 125.6 (s), 68.74 (d,  $J = 4.4$  Hz), 67.7 (d,  $J = 6.3$  Hz), 67.6 (d,  $J = 6.6$  Hz), 36.5 (d,  $J = 135.0$  Hz), 21.2 (s).  $^{31}\text{P}$  NMR (162 MHz,  $\text{CDCl}_3$ ):  $\delta$  (ppm) 29.6. HRMS-ESI:  $m/z$  found 419.1383 ( $[\text{M}+\text{Na}]^+$ ,  $\text{C}_{23}\text{H}_{25}\text{NaO}_4\text{P}^+$  calcd. 419.1388).

*(2-Hydroxy-2-(p-tolyl)ethyl)diphenylphosphine oxide (4u).*

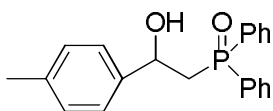

White solid; 131 mg, 78% yield, m.p. 104.7-106.1 °C.  $^1\text{H}$  NMR (400 MHz,  $\text{CDCl}_3$ ):  $\delta$  (ppm) 7.75 (m, 2H), 7.69 (m, 2H), 7.56 – 7.41 (m, 6H), 7.21 (d, 2H,  $J = 7.8$  Hz), 7.10 (d, 2H,  $J = 7.7$  Hz), 5.14 (t, 1H,  $J = 9.7$  Hz), 2.77 (m, 1H), 2.57 (m, 1H), 2.30 (s).  $^{13}\text{C}$  NMR (100 MHz,  $\text{CDCl}_3$ ):  $\delta$  (ppm) 141.1 (d,  $J = 13.2$  Hz), 137.4 (s), 132.2 (s), 131.1 (d,  $J = 9.5$  Hz), 130.56 (d,  $J = 9.7$  Hz), 129.3 (s), 128.9 (t,  $J = 12.7$  Hz), 125.6 (s), 69.1 (d,  $J = 4.1$  Hz), 39.4 (d,  $J = 68.5$  Hz), 21.2 (s).  $^{31}\text{P}$  NMR (162 MHz,  $\text{CDCl}_3$ ):  $\delta$  (ppm) 33.8. HRMS-ESI:  $m/z$  found 359.1171 ( $[\text{M}+\text{Na}]^+$ ,  $\text{C}_{21}\text{H}_{21}\text{NaO}_2\text{P}^+$  calcd. 359.1177).

*(2-Hydroxy-2-(thiophen-2-yl)ethyl)diphenylphosphine oxide (4v).*

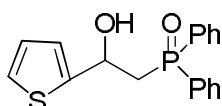

White solid; 107 mg, 65% yield, m.p. 153.6-155.1 °C.  $^1\text{H}$  NMR (400 MHz,  $\text{CDCl}_3$ ):  $\delta$  (ppm) 7.72 (m, 4H), 7.50 (m, 6H), 7.17 (m, 1H), 6.87 (m, 2H), 5.45 (m, 2H), 2.92 (m, 1H), 2.73 (m, 1H).  $^{13}\text{C}$  NMR (100 MHz,  $\text{CDCl}_3$ ):  $\delta$  (ppm) 148.2 (d,  $J = 14.8$  Hz), 132.2 (m), 130.96 (d,  $J = 9.6$  Hz), 130.6 (d,  $J = 9.8$  Hz), 128.9 (m), 126.6 (s), 124.7 (s), 123.3



(s), 65.6 (d,  $J = 3.5$  Hz), 39.5 (d,  $J = 68.8$  Hz).  $^{31}\text{P}$  NMR (162 MHz,  $\text{CDCl}_3$ ):  $\delta$  (ppm) 32.9. HRMS-ESI:  $m/z$  found 351.0584 ( $[\text{M}+\text{Na}]^+$ ,  $\text{C}_{18}\text{H}_{17}\text{NaO}_2\text{P}^+$  calcd. 351.0585).

(2-(4-Bromophenyl)-2-hydroxyethyl)diphenylphosphine oxide (**4w**).

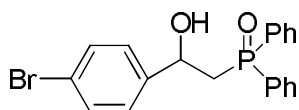

White solid; 134 mg, 67% yield, m.p. 143.4–144.6 °C.  $^1\text{H}$  NMR (400 MHz,  $\text{CDCl}_3$ ):  $\delta$  (ppm) 7.79 (m, 2H), 7.70 (m, 2H), 7.68 (m, 4H), 7.44 (m, 4H), 7.21 (d, 2H,  $J = 8.4$  Hz), 5.19 – 5.11 (m, 2H), 2.74 (m, 1H), 2.58 (m, 1H).  $^{13}\text{C}$  NMR (100 MHz,  $\text{CDCl}_3$ ):  $\delta$  (ppm) 143.1 (d,  $J = 12.9$  Hz), 132.38 (m), 131.7 (s), 131.1 (d,  $J = 9.4$  Hz), 130.6 (d,  $J = 9.6$  Hz), 129.05 (m), 127.5 (s), 121.5 (s), 68.9 (d,  $J = 4.2$  Hz), 39.4 (d,  $J = 68.4$  Hz).  $^{31}\text{P}$  NMR (162 MHz,  $\text{CDCl}_3$ ):  $\delta$  (ppm) 33.5. HRMS-ESI:  $m/z$  found 423.0126 ( $[\text{M}+\text{Na}]^+$ ,  $\text{C}_{20}\text{H}_{18}\text{BrNaO}_2\text{P}^+$  calcd. 423.0125).

Diisopropyl (2-oxo-2-phenylethyl)phosphonate (**5**) (CAS no: 57057-15-5).

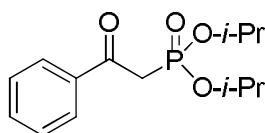

To a stirred ice-cold solution of **4a** (143 mg, 0.5 mmol) in dry  $\text{CH}_2\text{Cl}_2$  (8 mL) was added Dess-Martin's reagent (318 mg, 0.75 mmol). The reaction mixture was allowed to warm to room temperature and further stirred for 30 min. The reaction was evaporated and the residue was subjected to silica gel column chromatography, eluting with petroleum ether/EtOAc (3/1), to give **5** (colourless oil; 136 mg, 96% yield).  $^1\text{H}$  NMR (400 MHz,  $\text{CDCl}_3$ ):  $\delta$  (ppm) 7.92 – 7.90 (m, 2H), 7.48 – 7.44 (m, 1H), 7.37 – 7.34 (m, 2H), 4.67 – 4.56 (m, 2H), 3.49 (d, 2H,  $J = 22.8$  Hz), 1.17 (d, 6H,  $J = 4.2$  Hz), 1.16 (d, 6H,  $J = 4.2$  Hz).  $^{13}\text{C}$  NMR (100 MHz,  $\text{CDCl}_3$ ):  $\delta$  (ppm) 192.0 (d,  $J = 6.7$  Hz), 136.2 (s), 133.4 (s), 129.0 (s), 128.4 (s), 71.4 (d,  $J = 6.7$  Hz), 39.6 (d,  $J = 130.2$  Hz), 23.87 (d,  $J = 3.9$  Hz), 23.65 (d,  $J = 5.2$  Hz).  $^{31}\text{P}$  NMR (162 MHz,  $\text{CDCl}_3$ ):  $\delta$  (ppm) 17.7. MS-ESI:  $m/z$  307.1 ( $[\text{M}+\text{Na}]^+$ ).

2-(Diisopropoxyphosphoryl)-1-phenylethyl 4-nitrobenzoate (**6**).

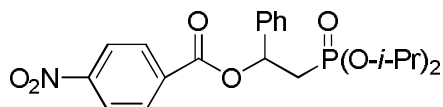

A solution of diethyl azodicarboxylate (DEAD, 104 mg, 0.6 mmol) in  $\text{CH}_2\text{Cl}_2$  (2.0 mL) was slowly added at rt via cannula to a solution of triphenylphosphine (144 mg, 0.55 mmol), 4-nitrobenzoic acid (92 mg, 0.55 mmol), and **4a** (143 mg, 0.5 mmol) in  $\text{CH}_2\text{Cl}_2$  (1.0 mL), and the resulting mixture was stirred at rt for 2 h. The reaction was evaporated and the residue was subjected to silica gel column chromatography, eluting with petroleum ether/EtOAc (3/1), to give **6** (colourless oil; 153 mg, 64% yield).  $^1\text{H}$  NMR (400 MHz,  $\text{CDCl}_3$ ):  $\delta$  (ppm) 8.26 (s, 4H), 7.45 – 7.43 (m, 2H), 7.38 – 7.29 (m, 3H), 6.35 – 6.29 (m, 1H), 4.72 – 4.62 (m, 2H), 2.71 – 2.61 (m, 1H), 2.43 – 2.33 (m, 1H), 1.25 – 1.22 (m, 6H), 1.20 (d, 6H,  $J = 6.2$  Hz).  $^{13}\text{C}$  NMR (100 MHz,  $\text{CDCl}_3$ ):  $\delta$  (ppm) 163.7 (s), 150.8 (s), 139.7 (d,  $J = 11.4$  Hz), 135.8 (s), 131.1 (s), 128.94 (s), 128.90 (s), 126.7 (s), 123.7 (s), 73.0 (d,  $J = 3.1$  Hz), 70.9 (d,  $J = 6.9$  Hz), 70.8 (d,  $J = 6.9$  Hz), 35.0 (d,  $J = 142.0$  Hz), 24.1 (m).  $^{31}\text{P}$  NMR (162 MHz,  $\text{CDCl}_3$ ):  $\delta$  (ppm) 27.9. HRMS-ESI:  $m/z$  found 458.1342 ( $[\text{M}+\text{Na}]^+$ ,  $\text{C}_{21}\text{H}_{26}\text{NNaO}_7\text{P}^+$  calcd. 458.1345).

*Diisopropyl ((4-methyl-1-tosylpyrrolidin-3-yl)methyl)phosphonate (7).*

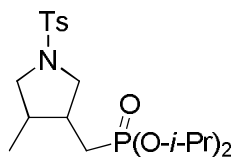

An oven-dried Schlenk tube containing  $\text{Mn}(\text{OAc})_3 \cdot 2\text{H}_2\text{O}$  (1.5 mmol, 402 mg) was evacuated and purged with nitrogen three times. *N,N*-Diallyl-4-methylbenzenesulfonamide (0.50 mmol, 126 mg), *H*-phosphonate (1.0 mmol, 166 mg) and  $\text{CH}_3\text{COOH}$  (3 mL) were sequentially added to the system at room temperature. The reaction mixture was heated with stirring at 60 °C for 8 hours. The reaction was evaporated and the residue was subjected to silica gel column chromatography, eluting with petroleum ether/EtOAc (1/1), to give **8** (colourless oil; 100 mg, 48% yield).  $^1\text{H}$  NMR (400 MHz,  $\text{CDCl}_3$ ):  $\delta$  (ppm) 7.70 (d, 2H,  $J = 8.2$  Hz), 7.31 (d, 2H,  $J = 8.1$  Hz), 4.68 – 4.61 (m, 2H), 3.47 (dd, 1H,  $J = 10.0$  Hz,  $J = 7.3$  Hz), 3.32 (dd, 1H,  $J = 9.7$  Hz,  $J = 6.2$  Hz), 3.08 – 3.02 (m, 2H), 2.42 (s, 3H), 2.36 – 2.29 (m, 1H), 2.27 – 2.21 (m, 1H), 1.86 – 1.72 (m, 2H), 1.30 – 1.26 (m, 12H), 0.74 (d, 3H,  $J = 7.0$  Hz).  $^{13}\text{C}$  NMR (100 MHz,  $\text{CDCl}_3$ ):  $\delta$  (ppm) 143.5 (s), 134.2 (s), 129.8 (s), 127.6 (s), 70.6 (d,  $J = 6.7$  Hz), 70.45 (d,  $J = 6.8$  Hz), 54.6 (s), 51.5 (d,  $J = 9.0$  Hz), 36.7 (d,  $J = 4.6$  Hz), 36.1 (d,  $J = 12.5$  Hz), 25.8 (d,  $J = 143.7$  Hz), 24.2 (m), 21.7 (s), 13.3 (s).  $^{31}\text{P}$  NMR (162 MHz,  $\text{CDCl}_3$ ):  $\delta$  (ppm) 27.9. HRMS-ESI:  $m/z$  found 440.1635 ( $[\text{M}+\text{Na}]^+$ ,  $\text{C}_{19}\text{H}_{32}\text{NNaO}_5\text{PS}^+$  calcd. 440.1637).

# $^{31}\text{P}$ NMR, $^1\text{H}$ NMR and $^{13}\text{C}$ NMR spectra

3a

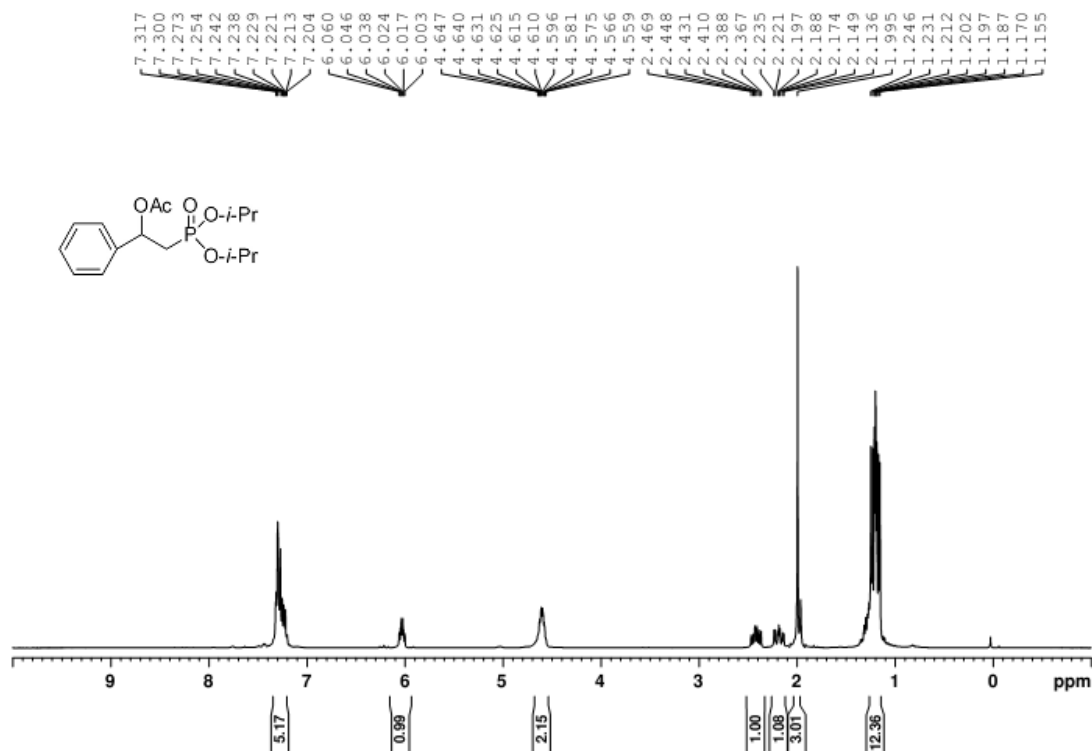

3a

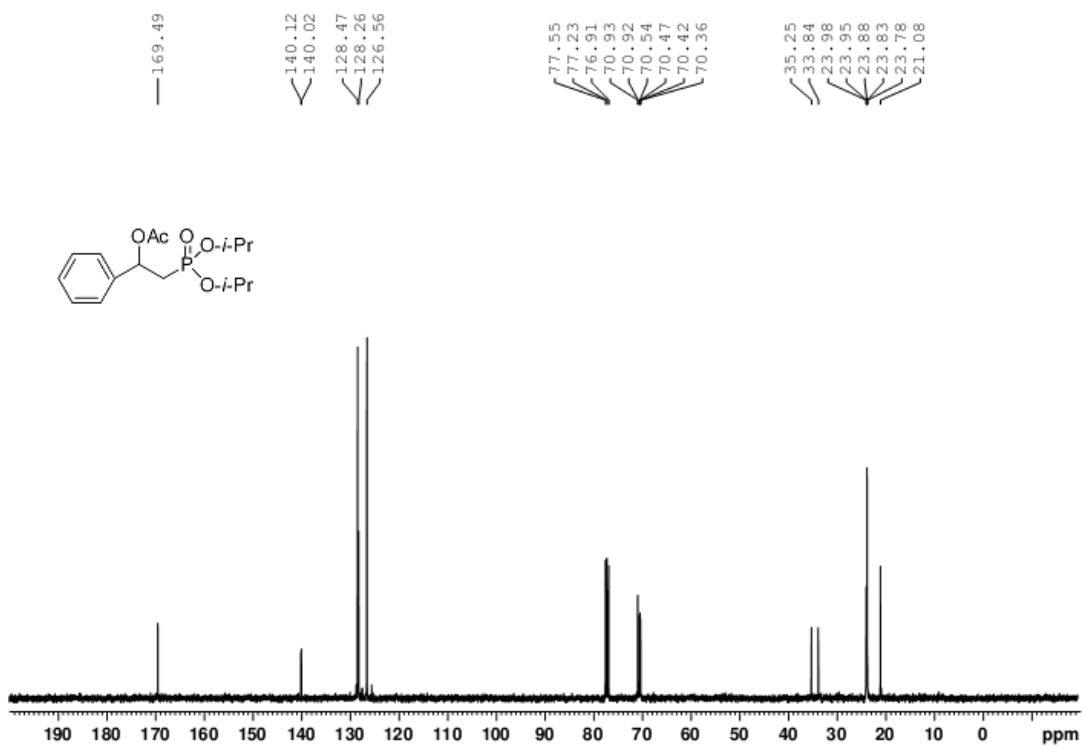

3a

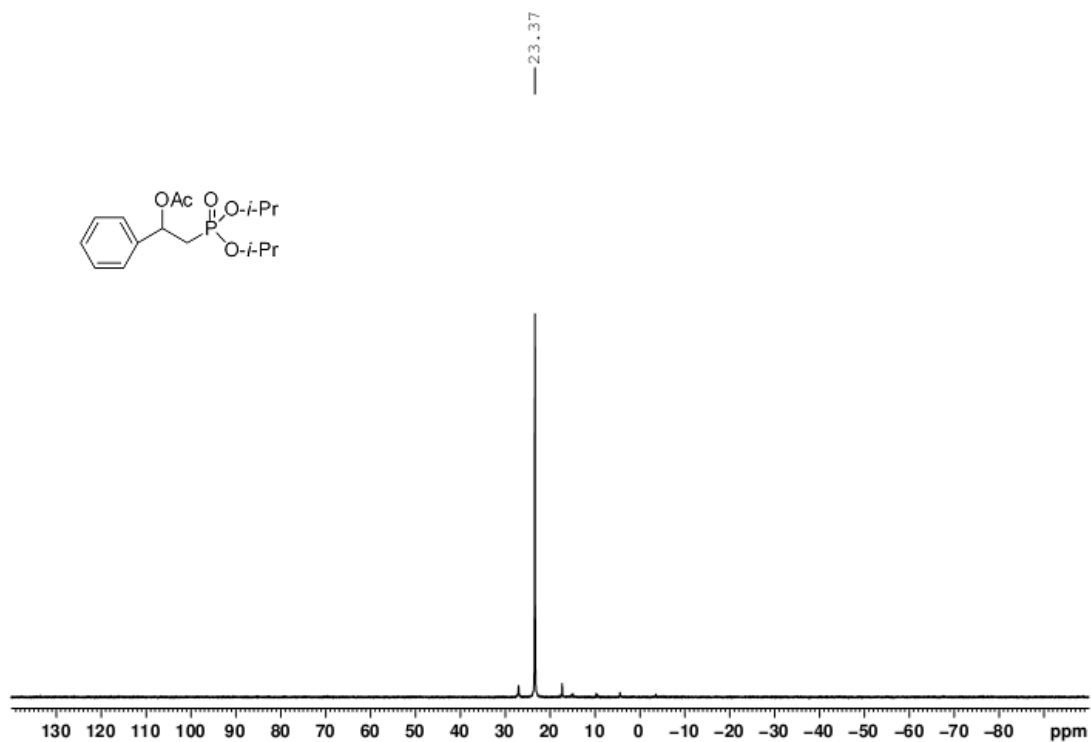

3b

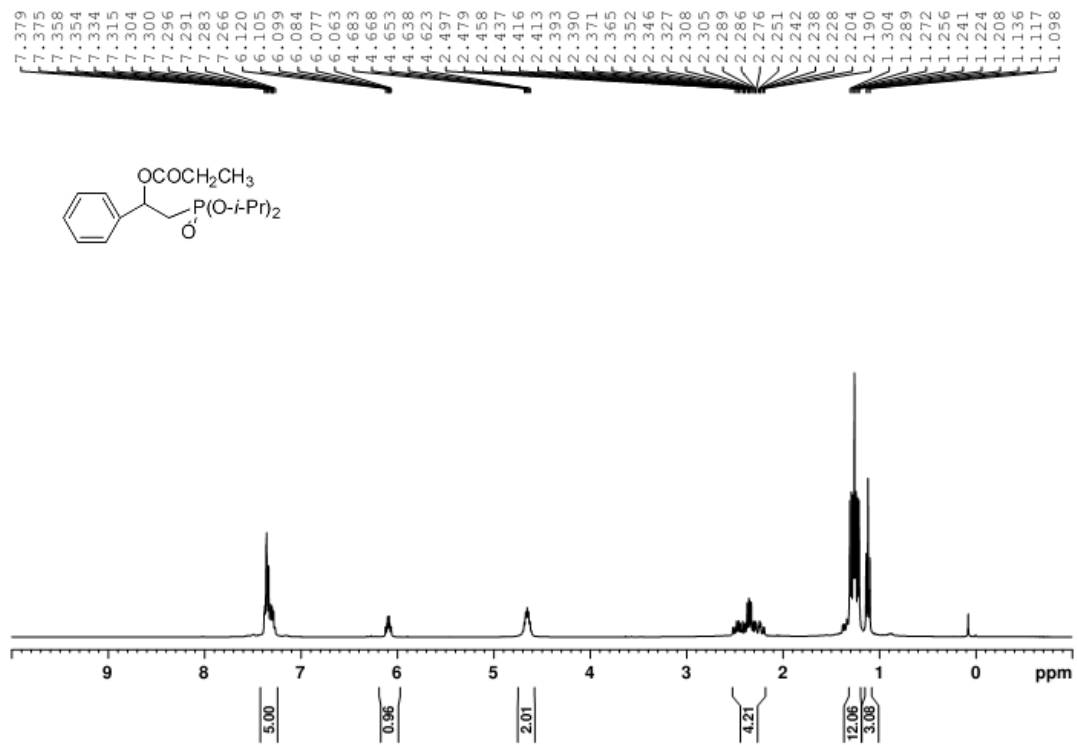

3b

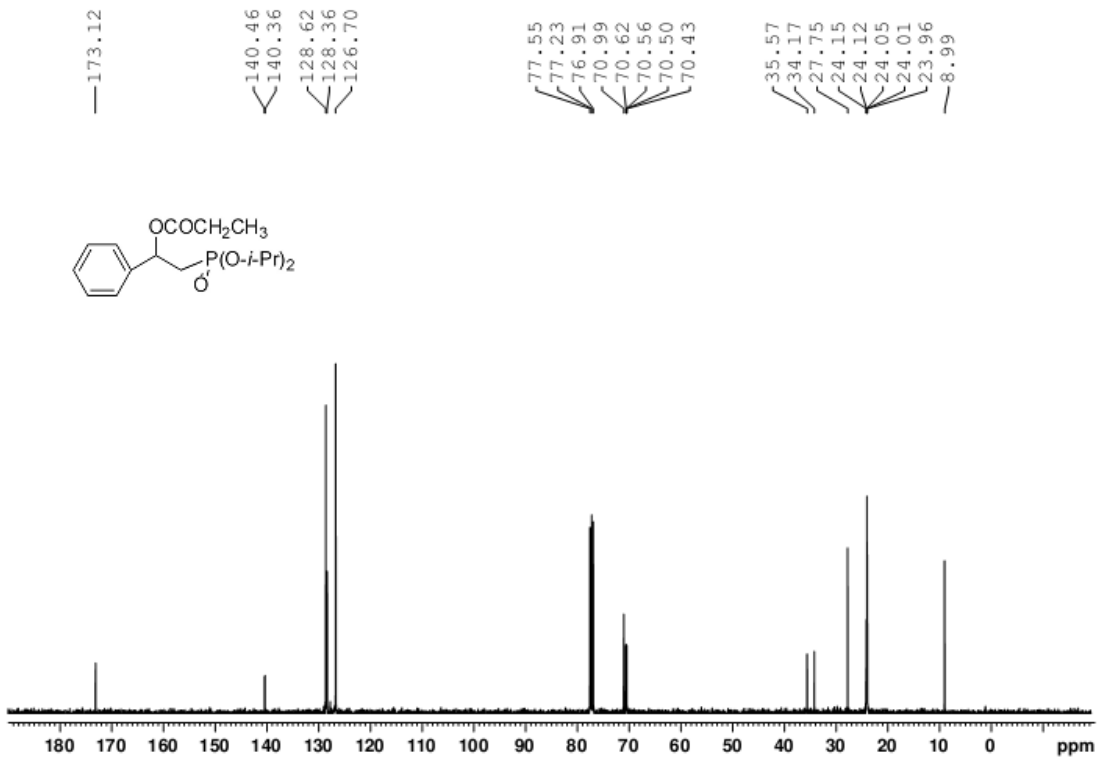

3b

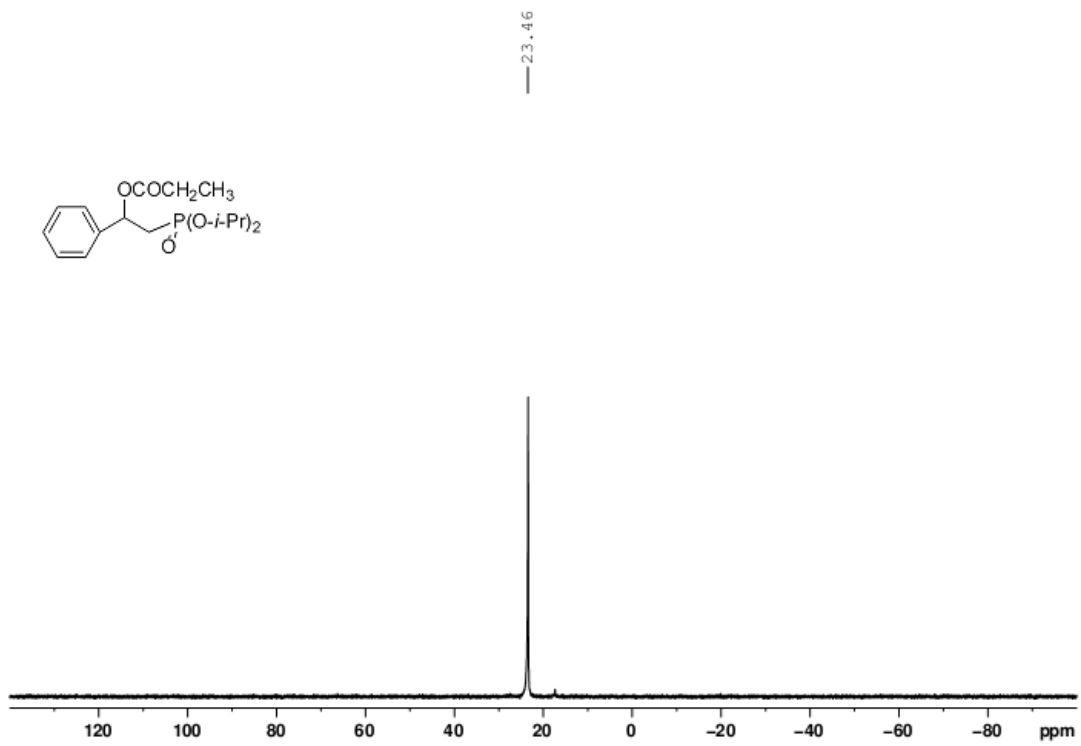

4a

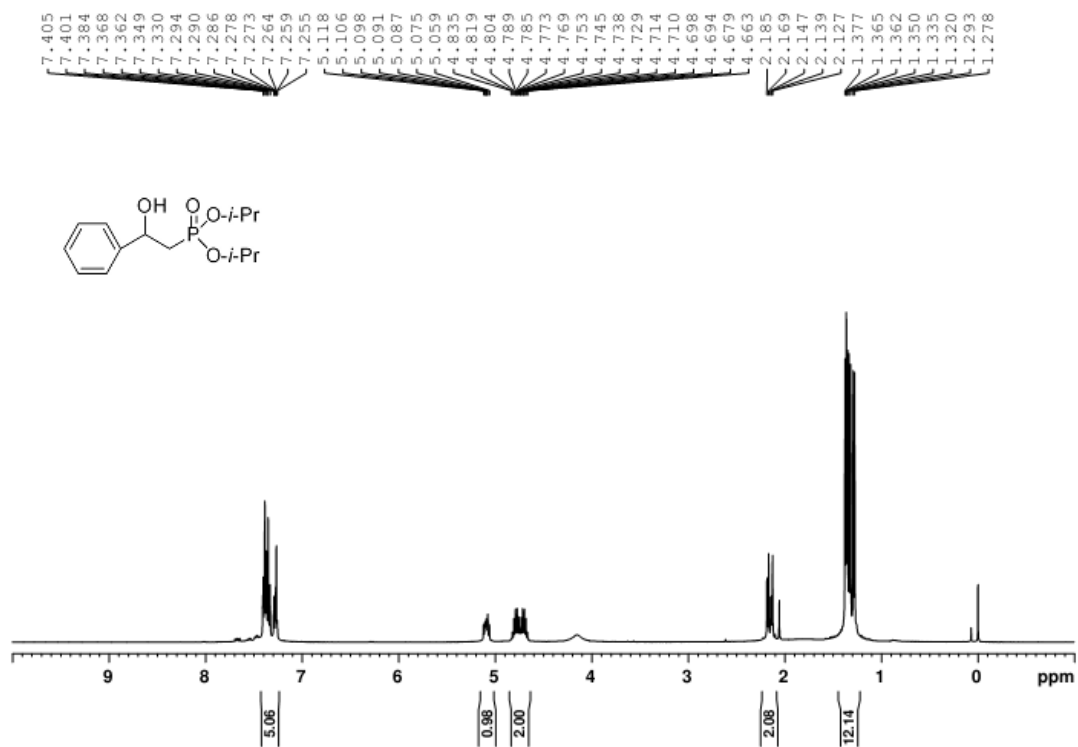

4a

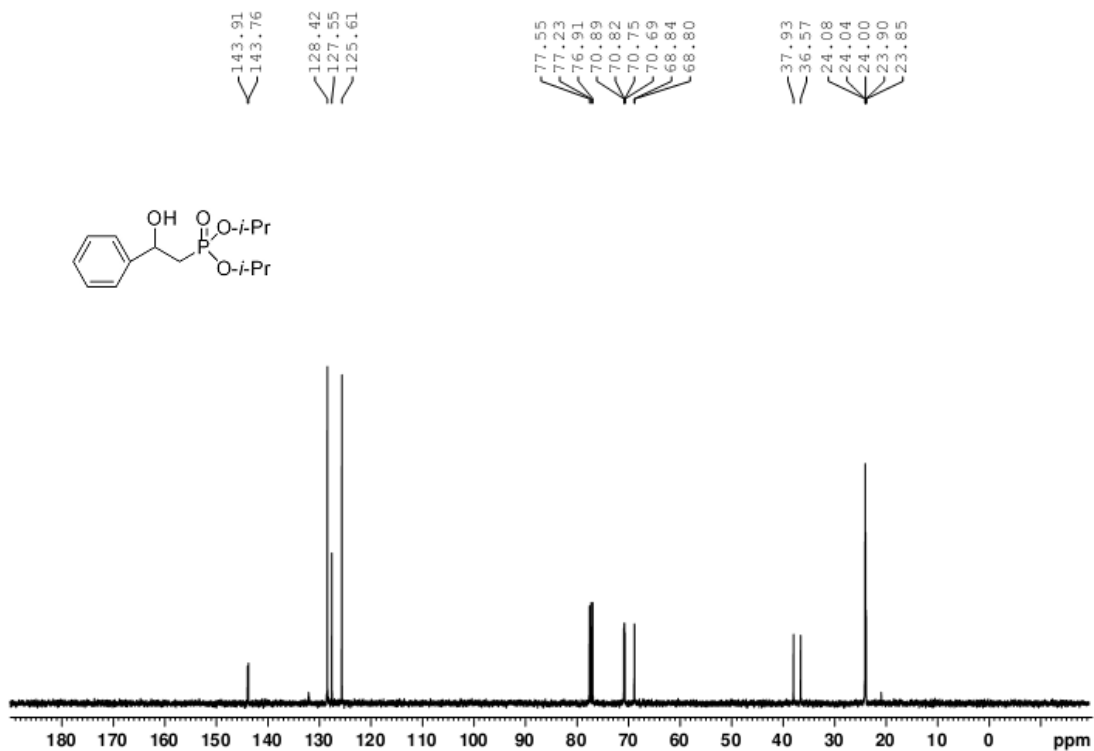

4b

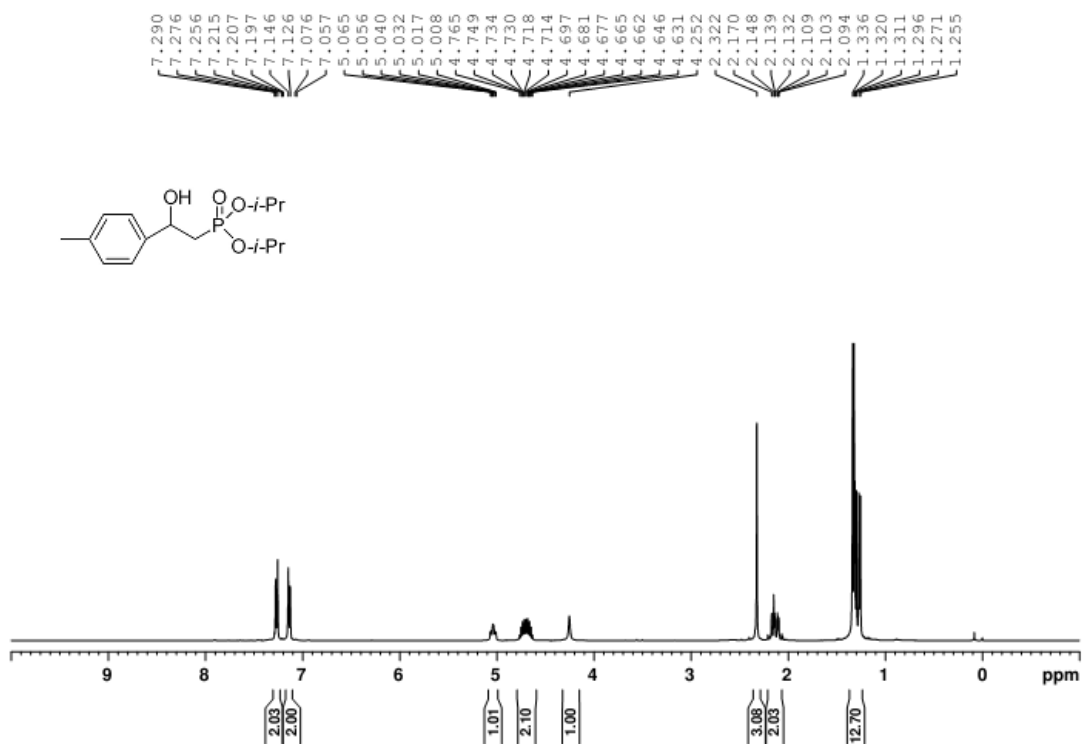

4b

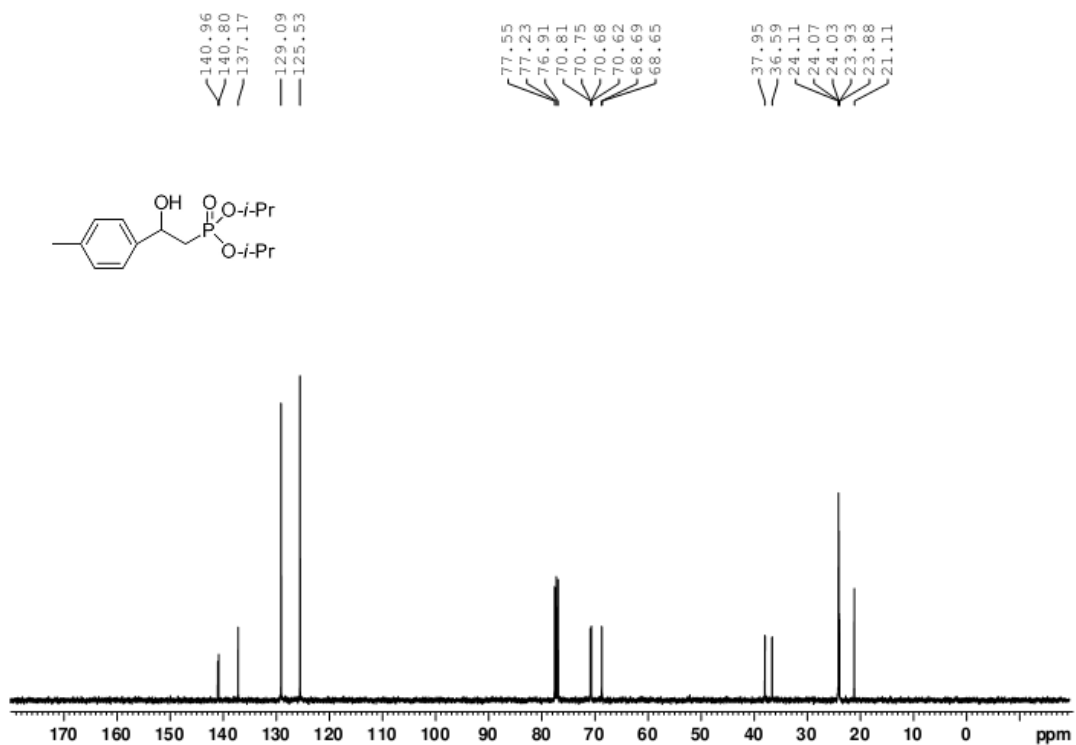

4c

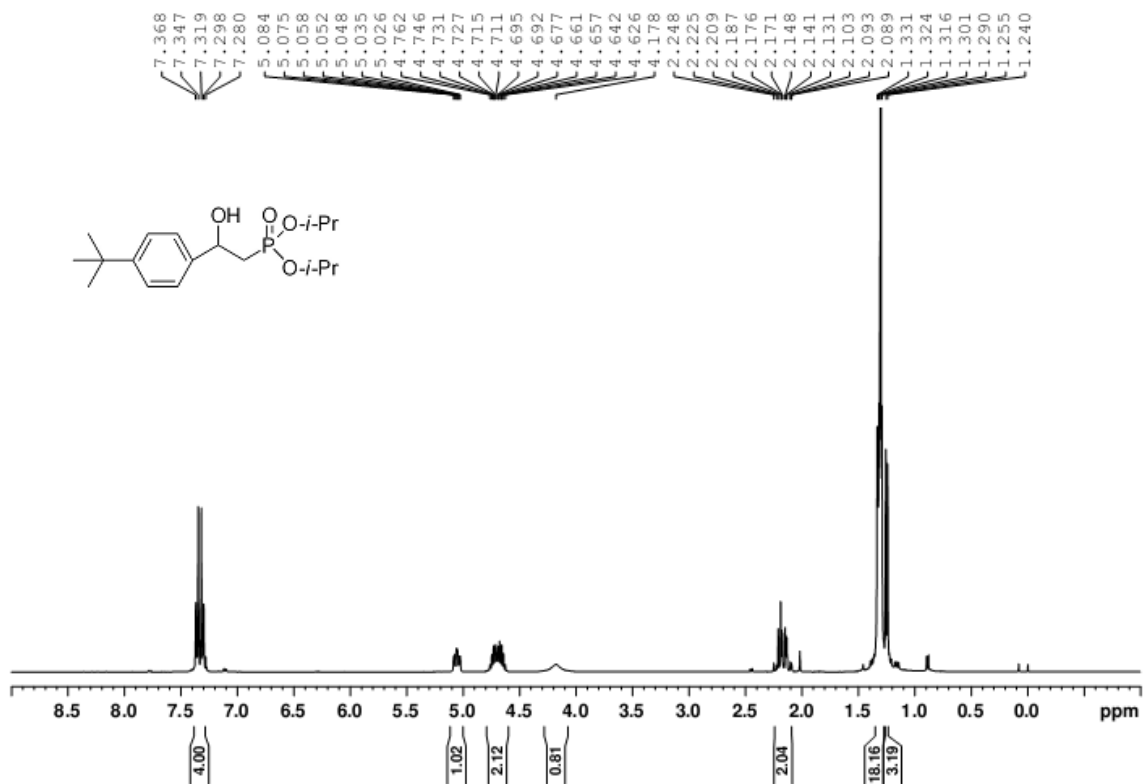

4c

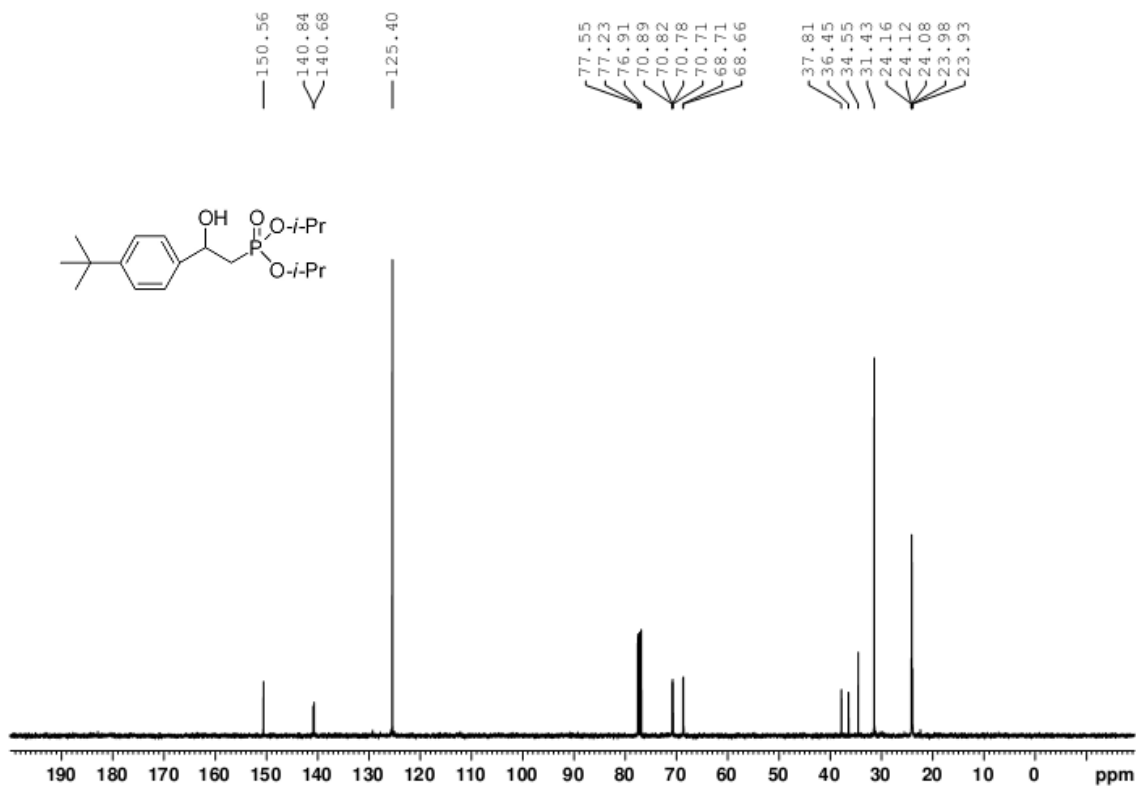



4d

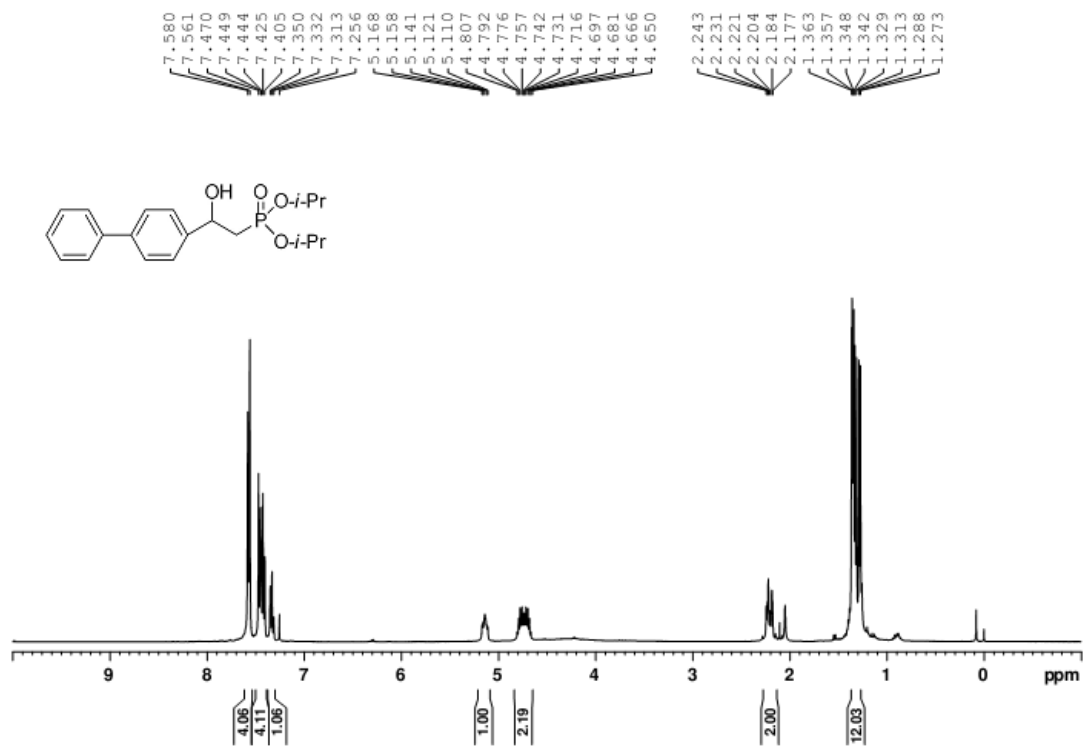

4d

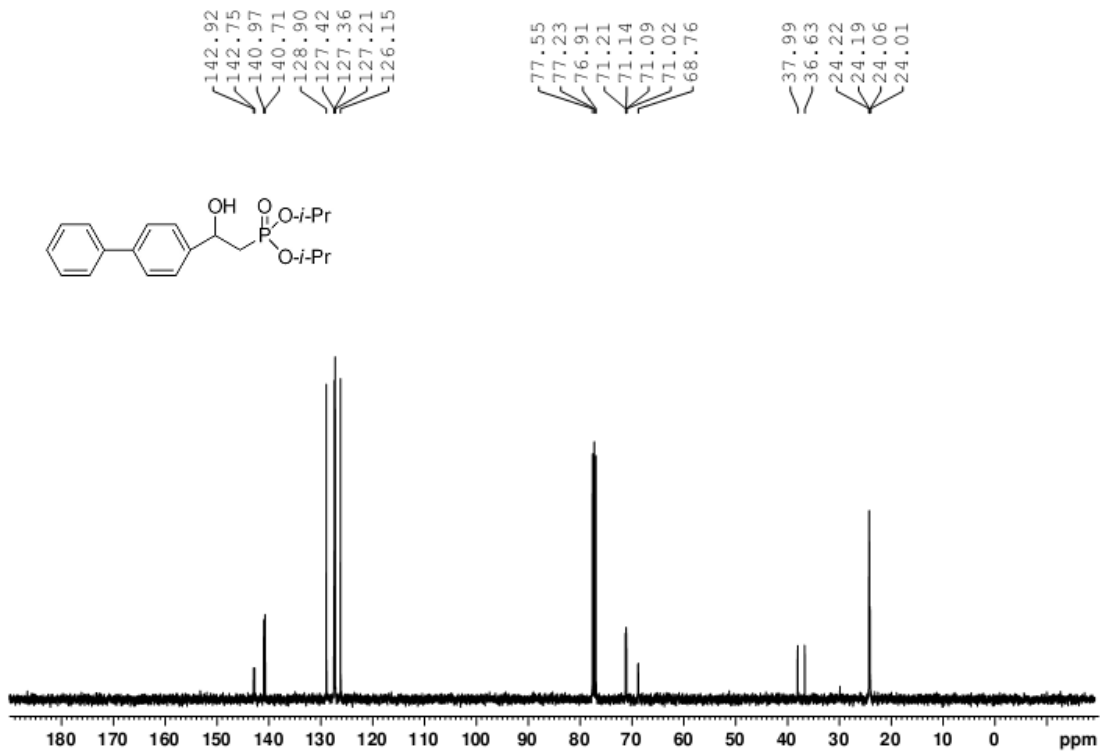

4e

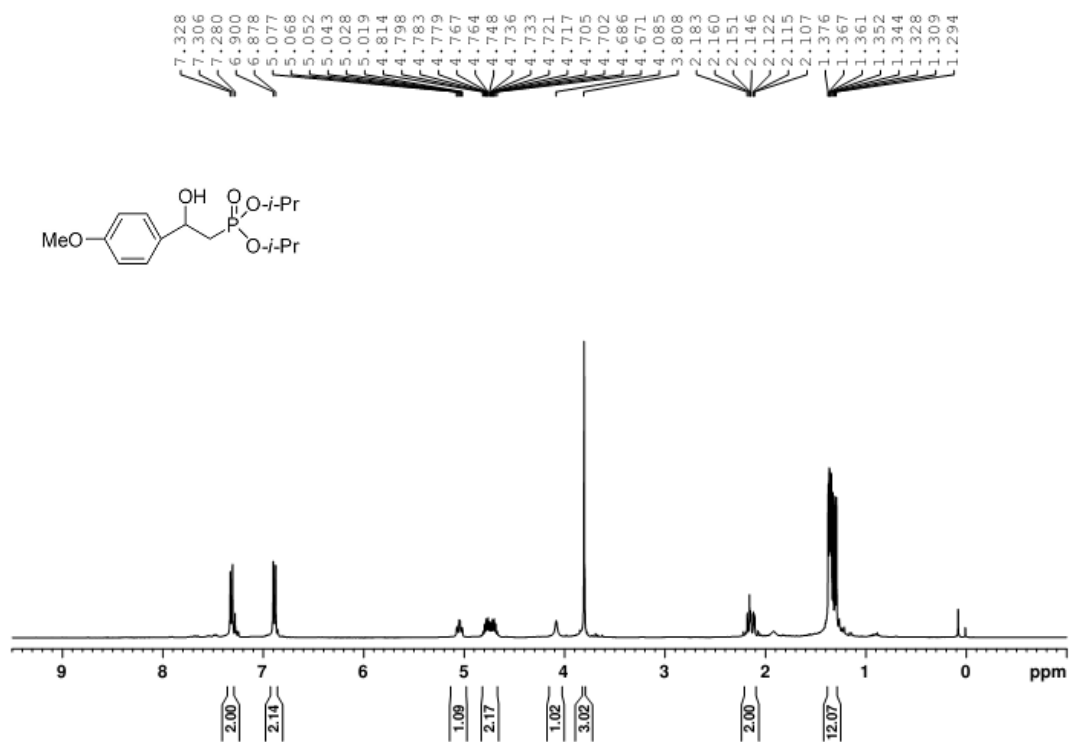

4e

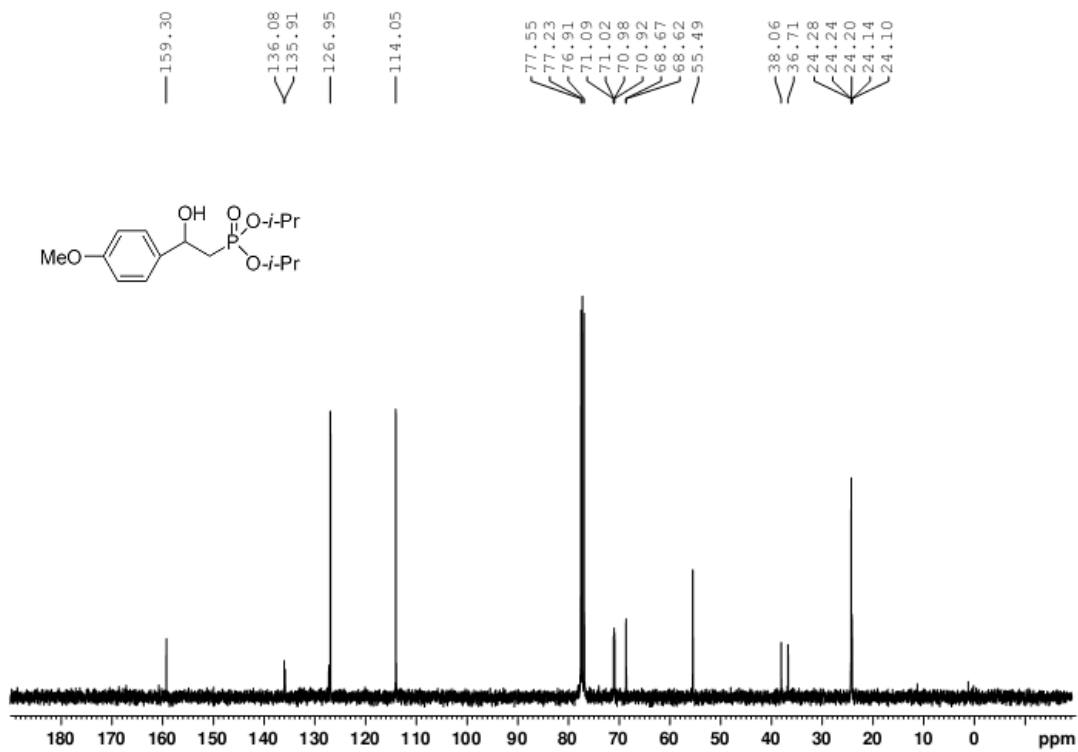

4f

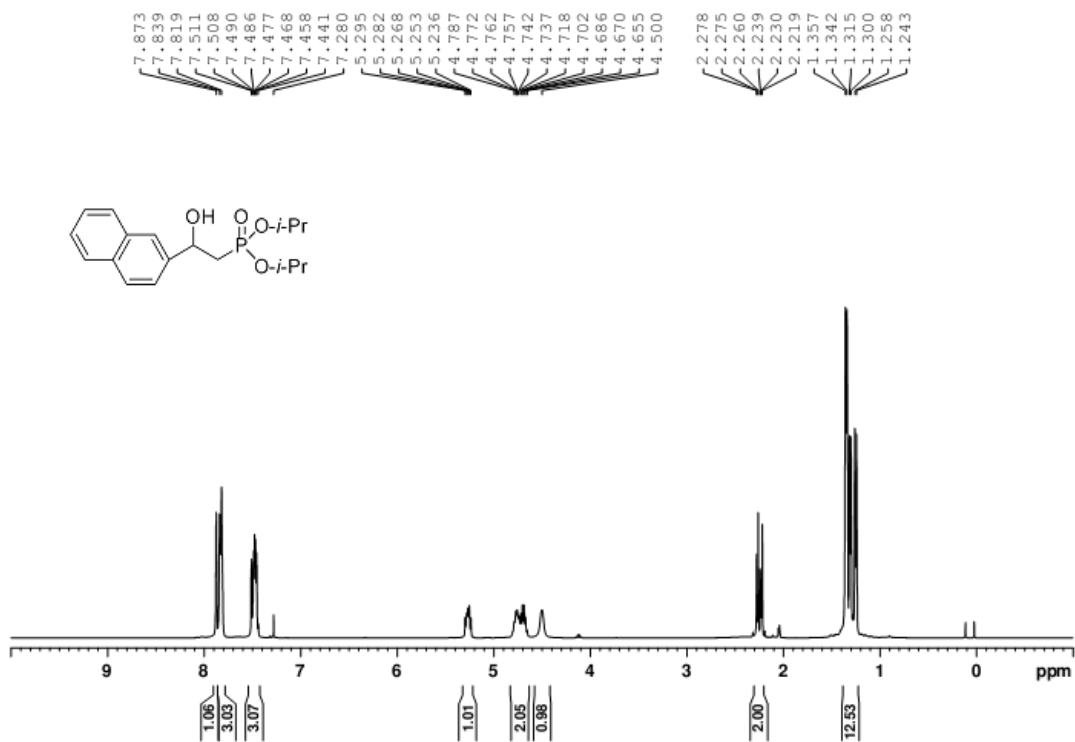

4f

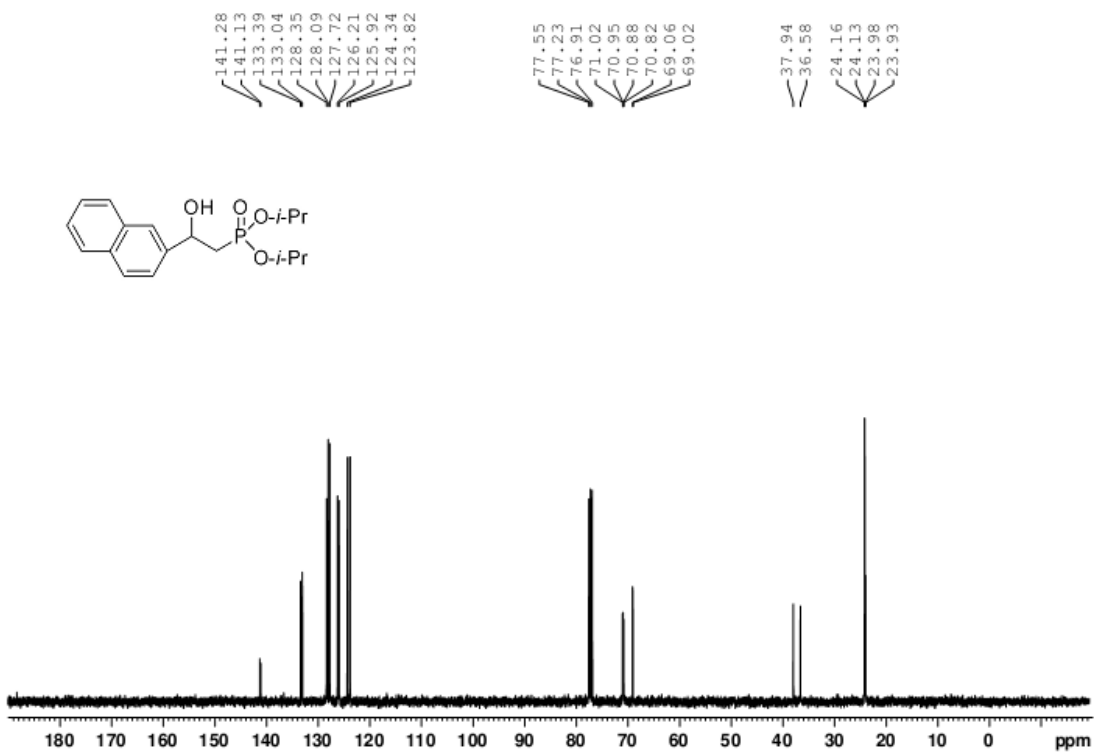

4g

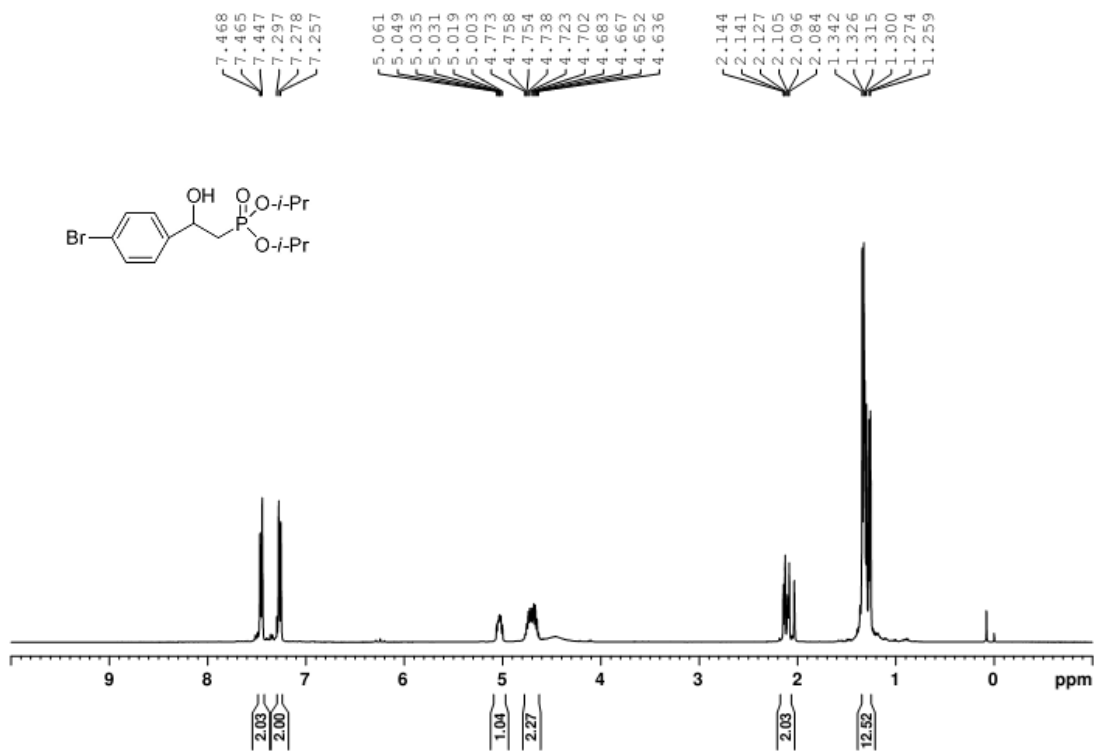

4g

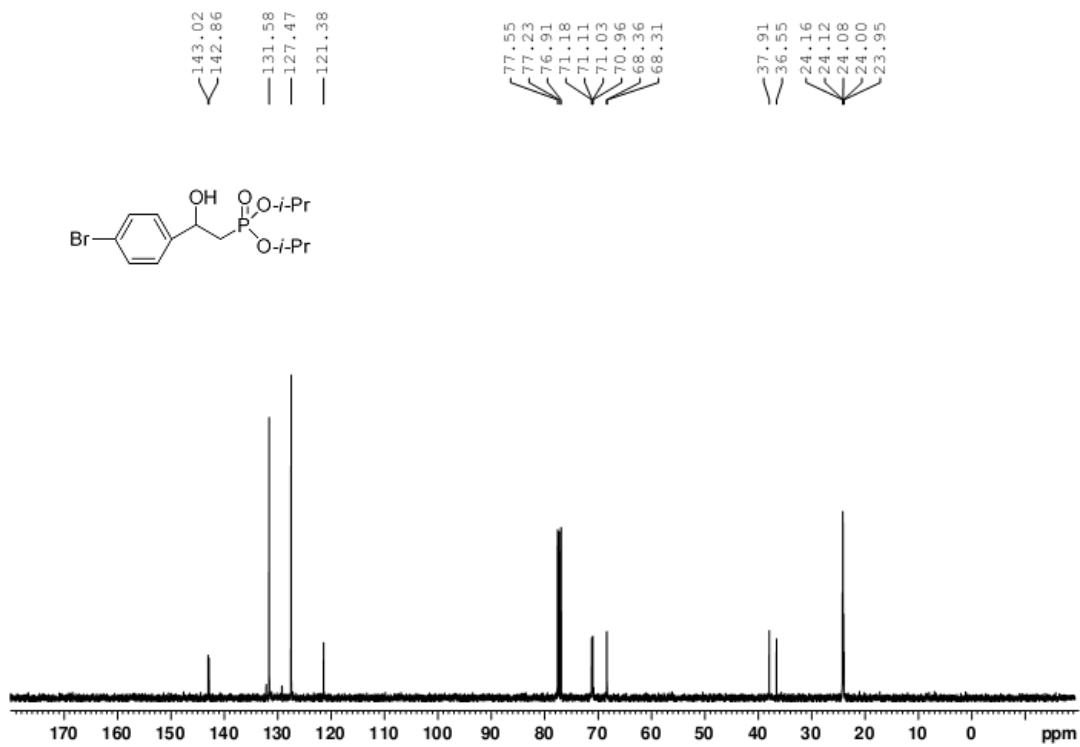

4h

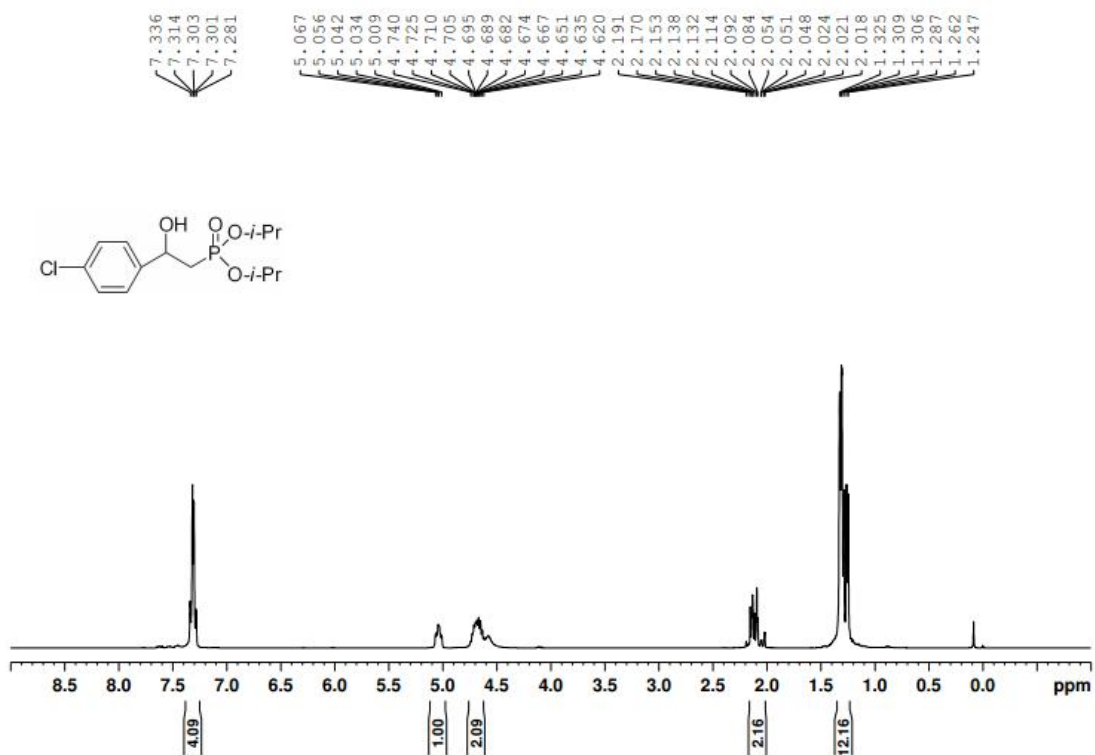

4h

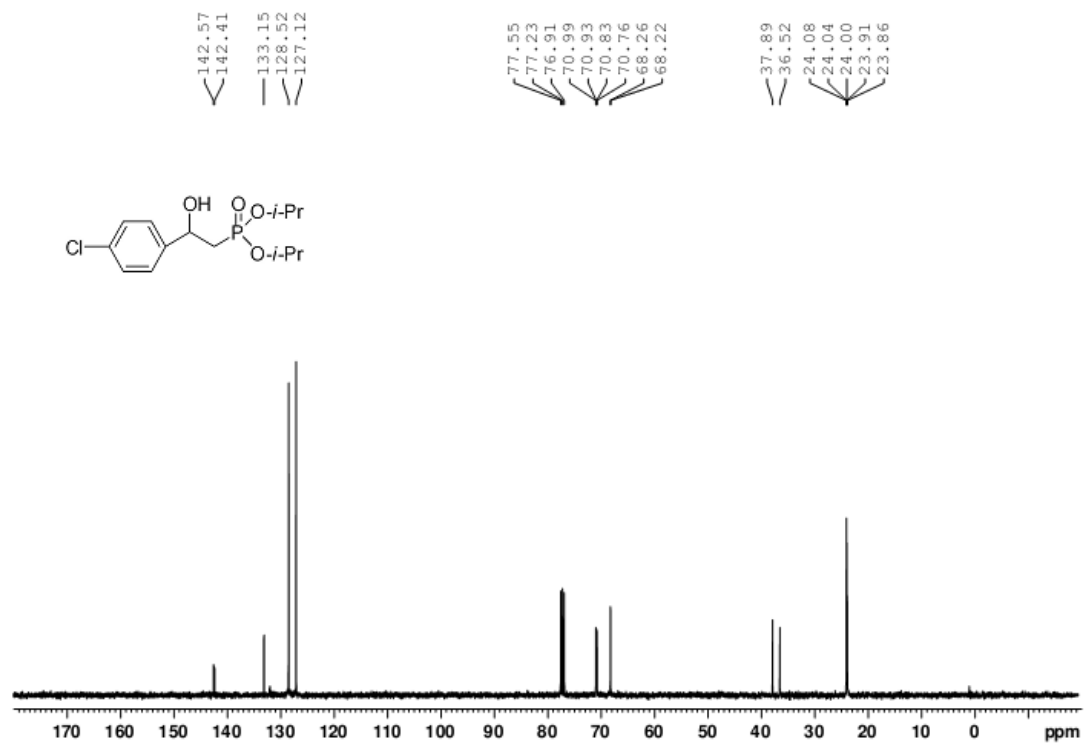

4i

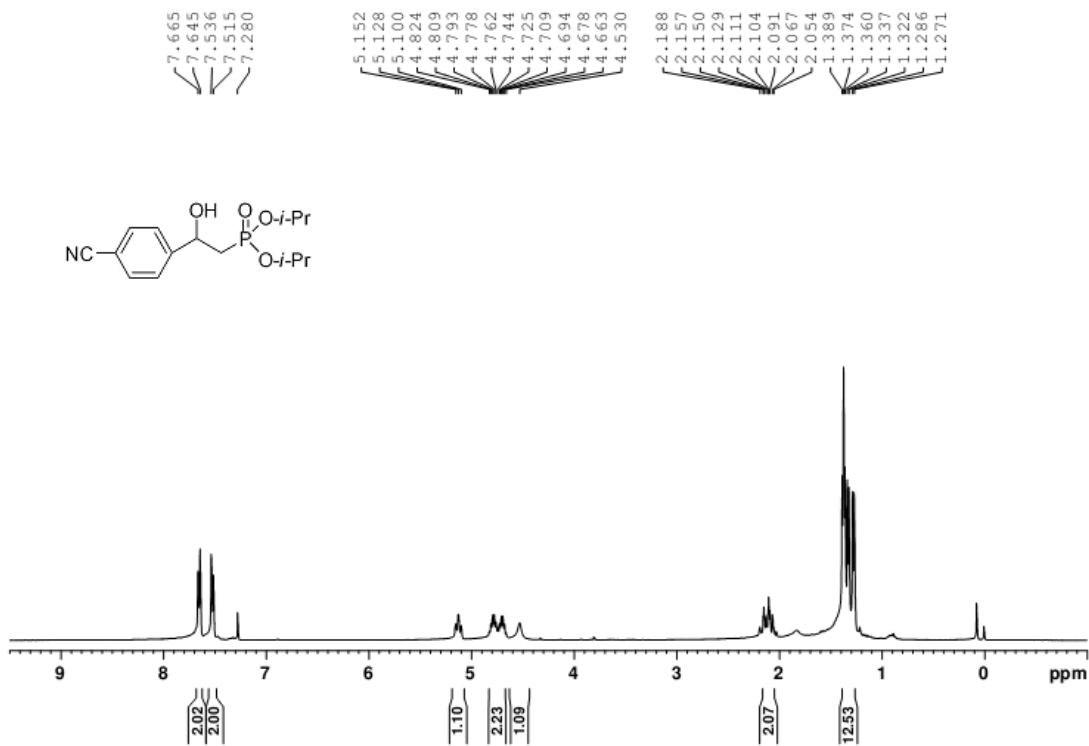

4i

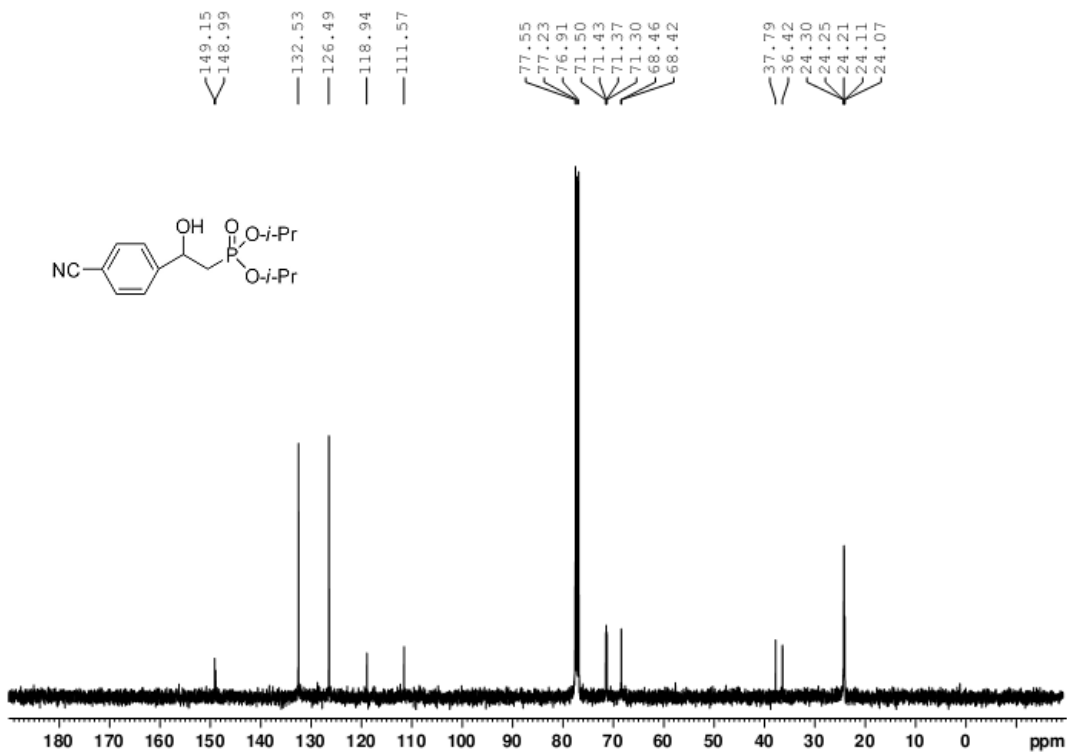

4j

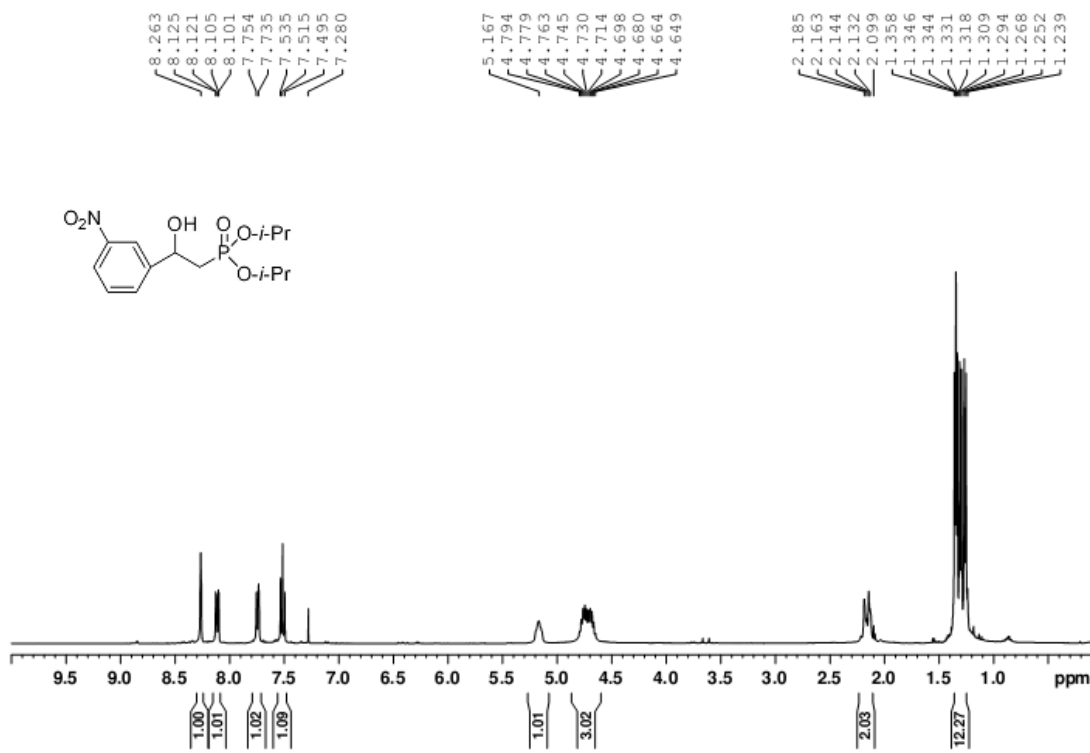

4j

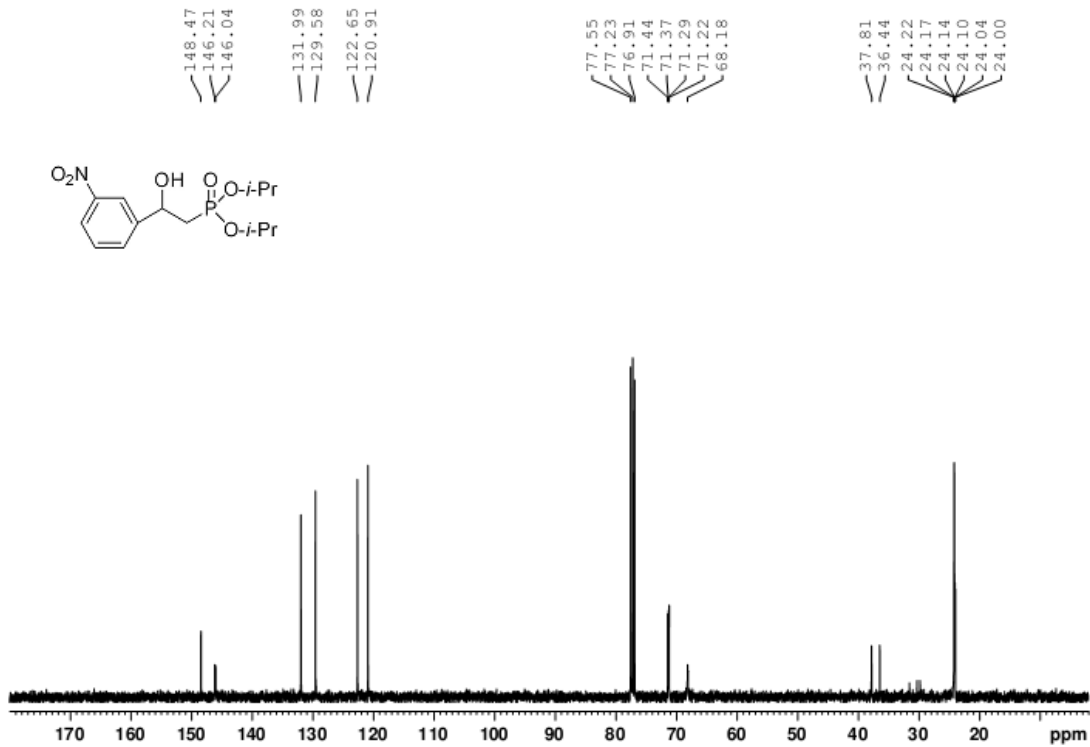

4k

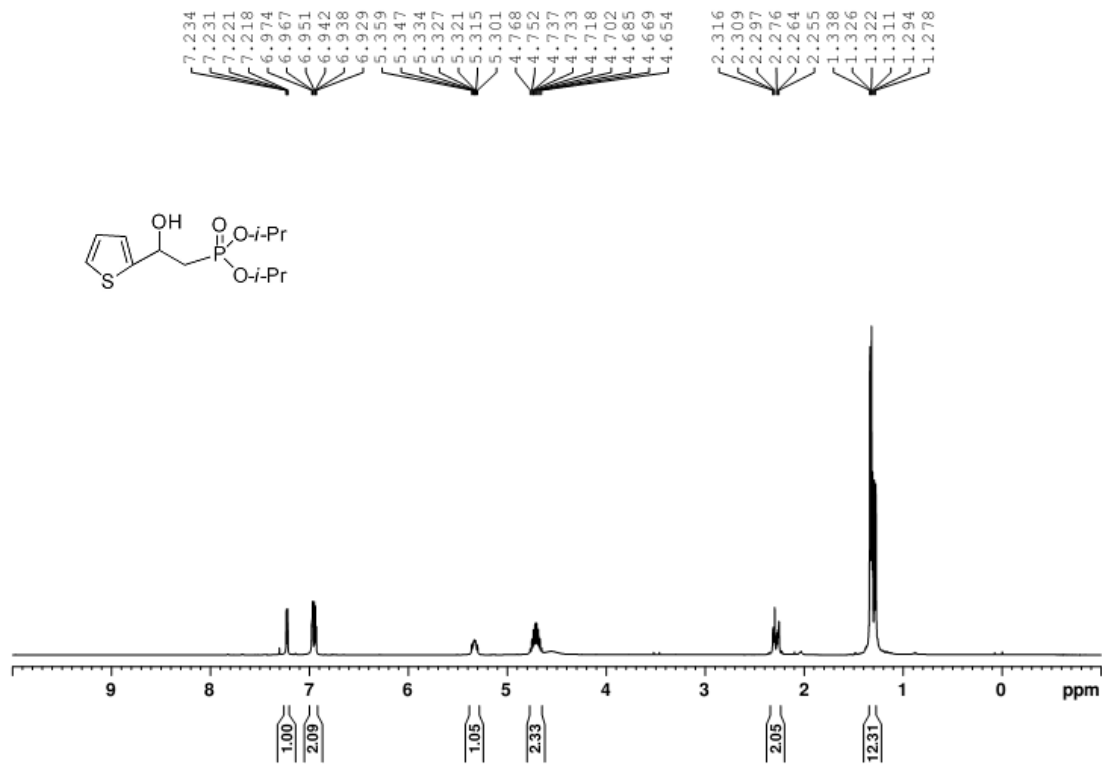

4k

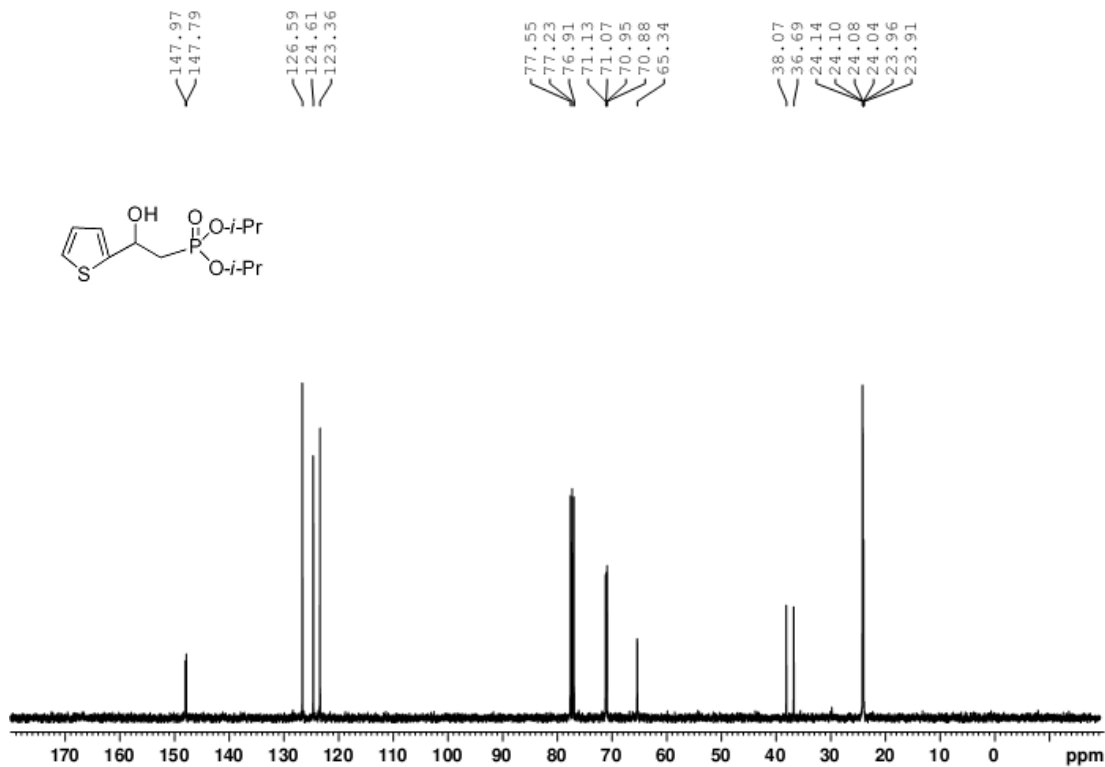



41

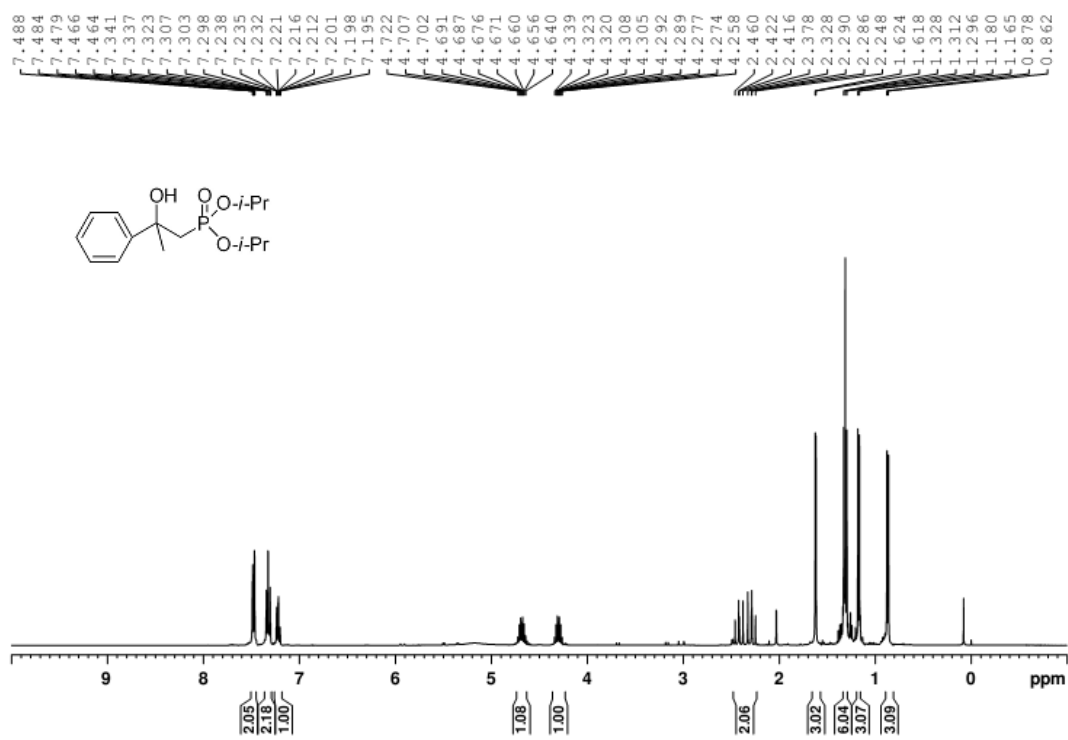

41

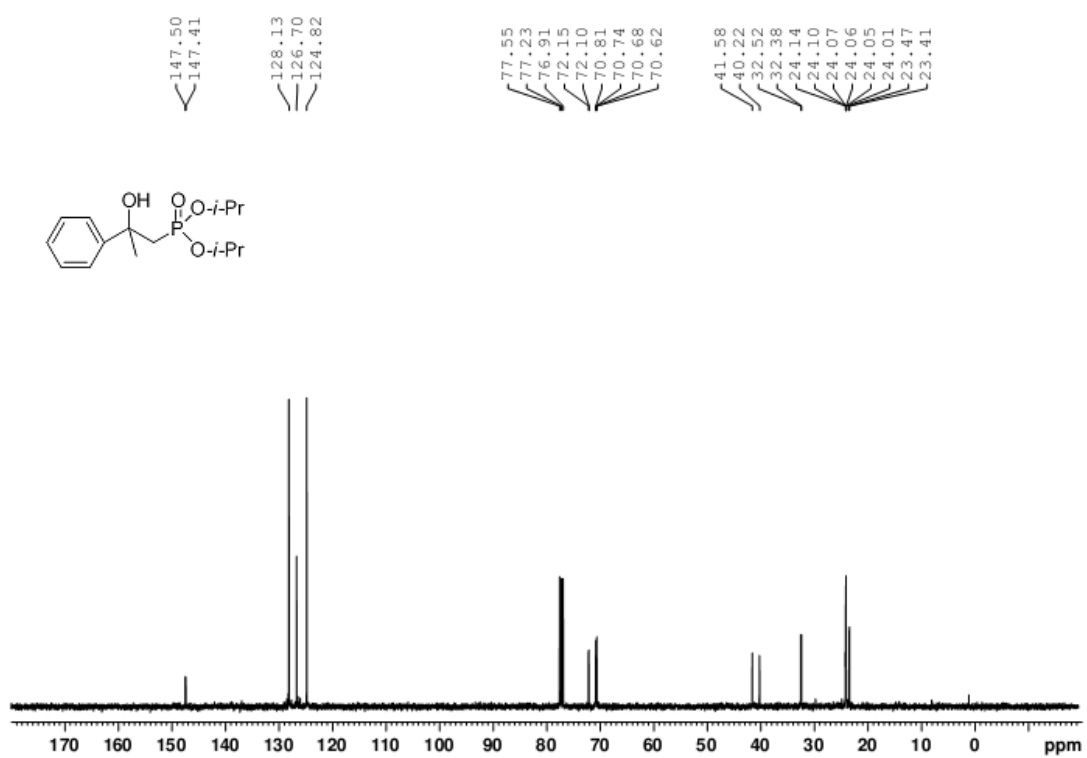

4m

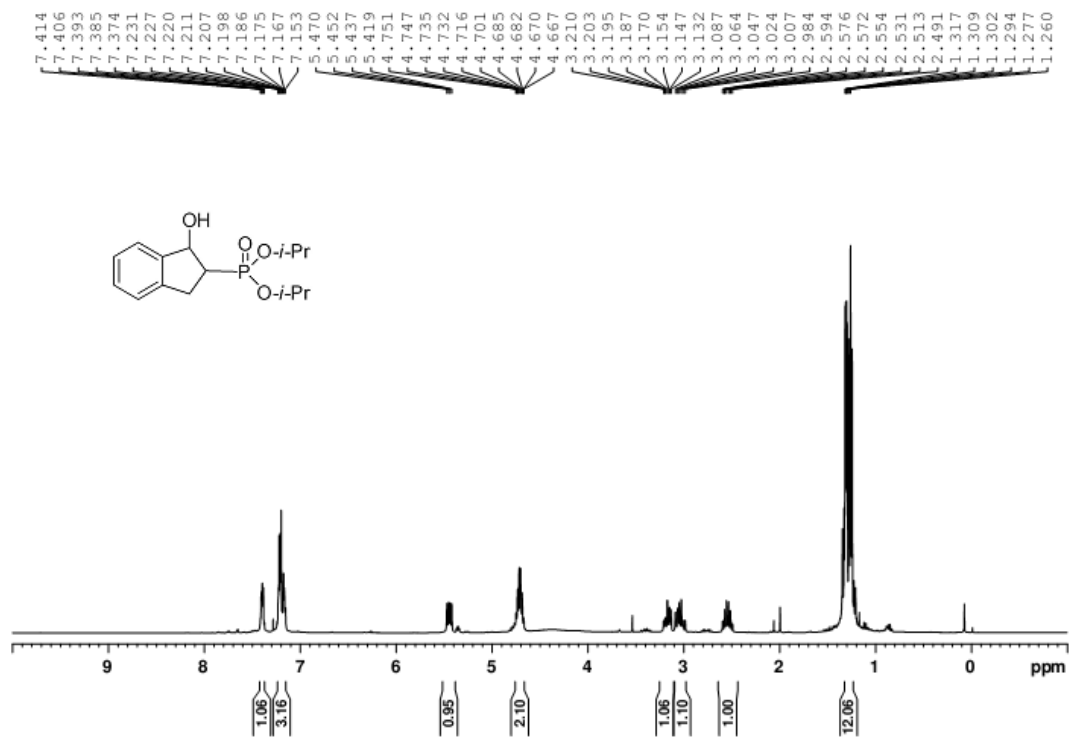

4m

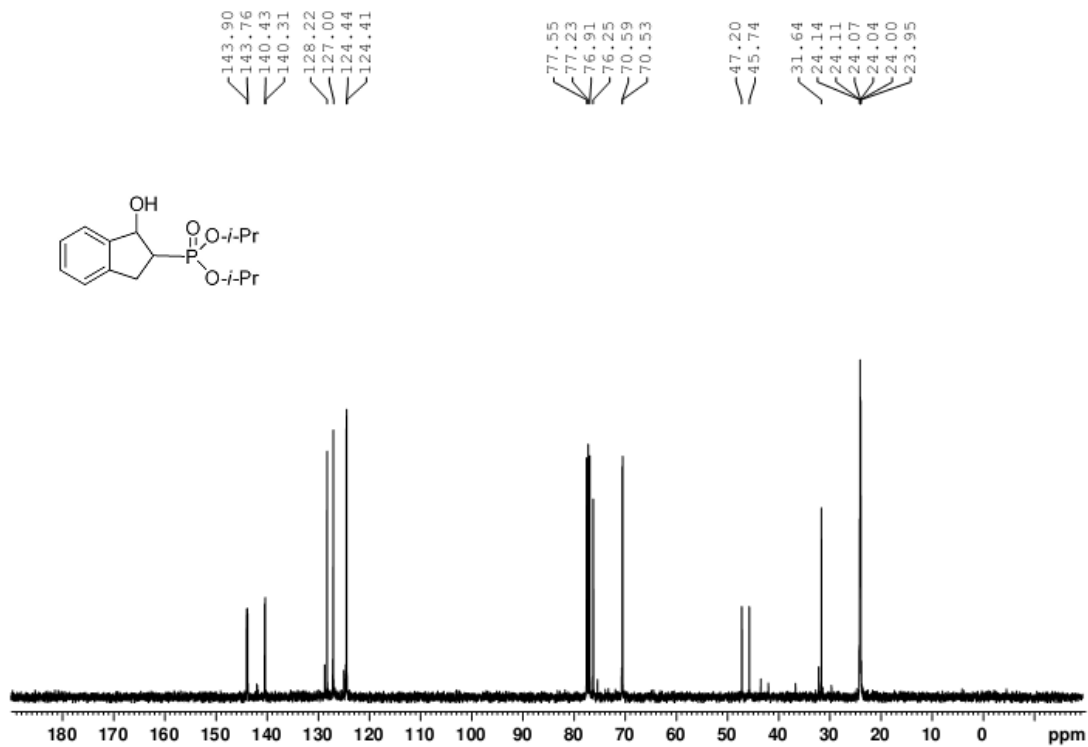

4n

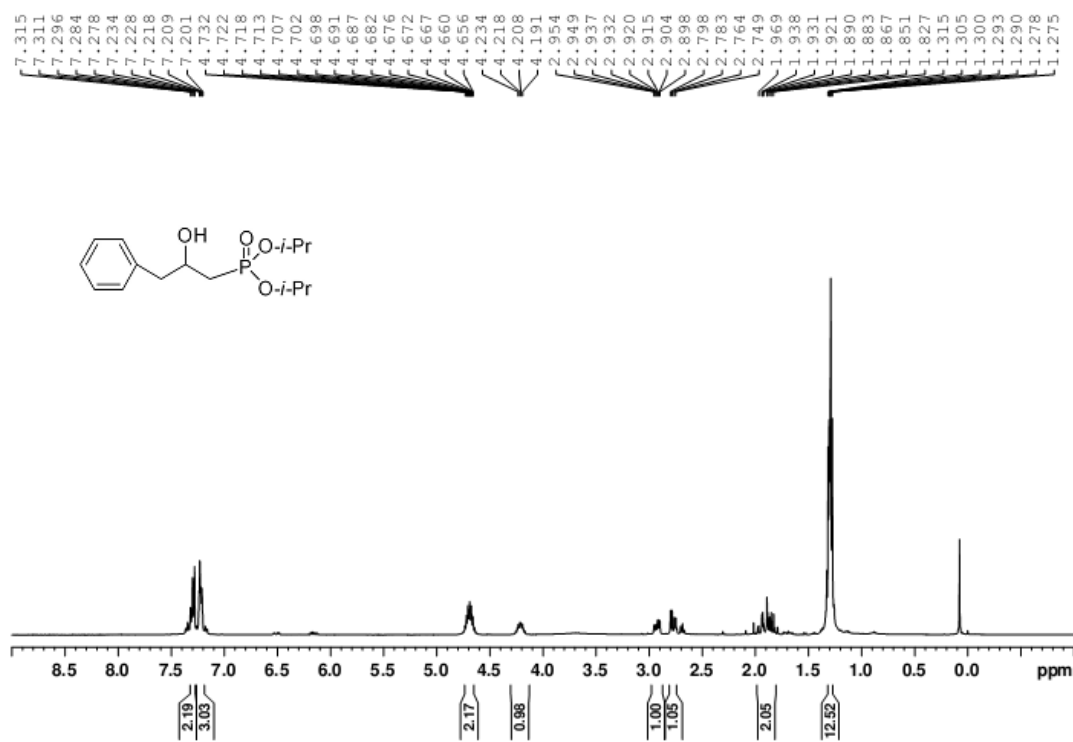

4n

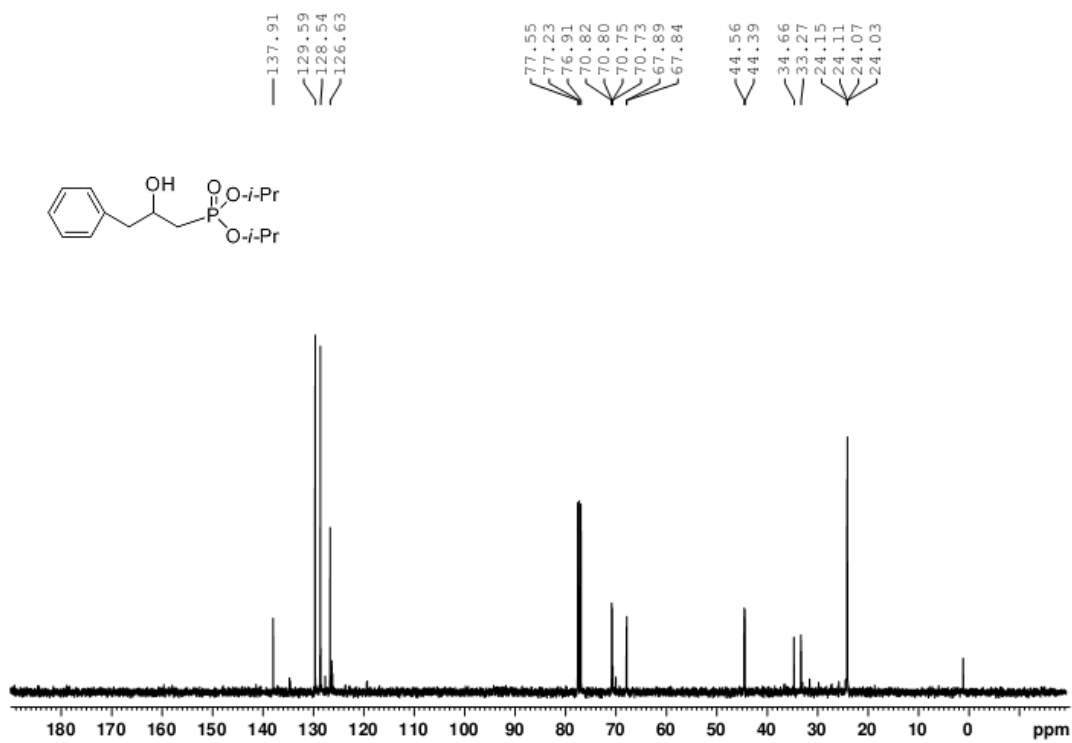

40

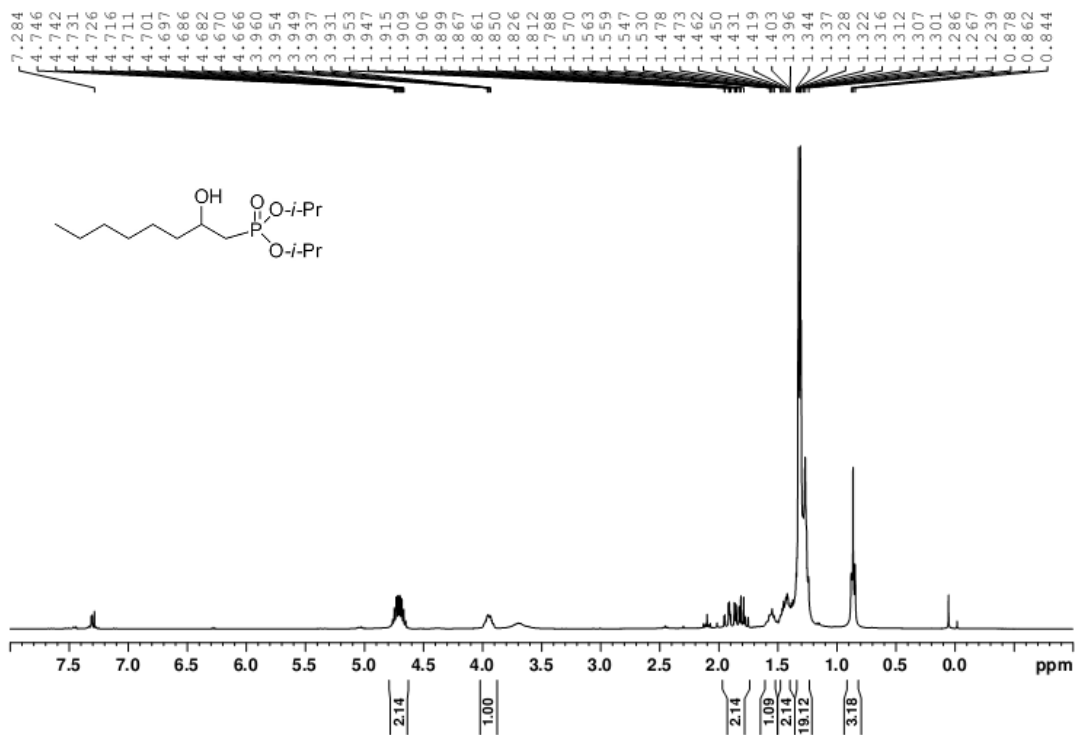

40

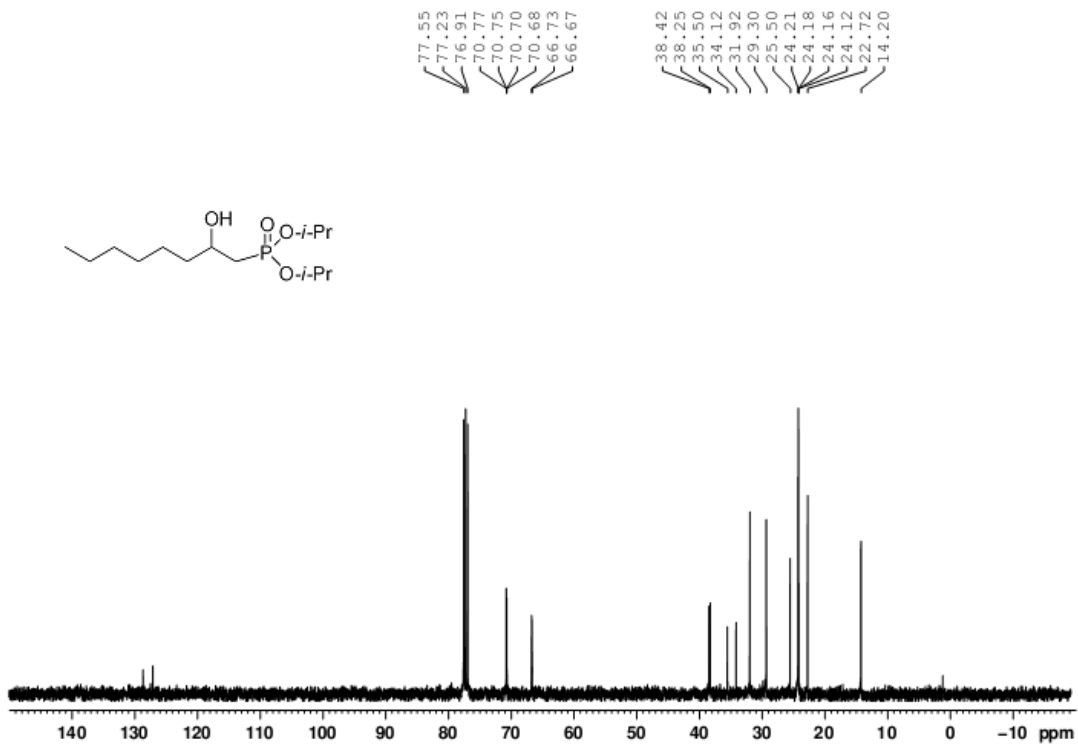

4p

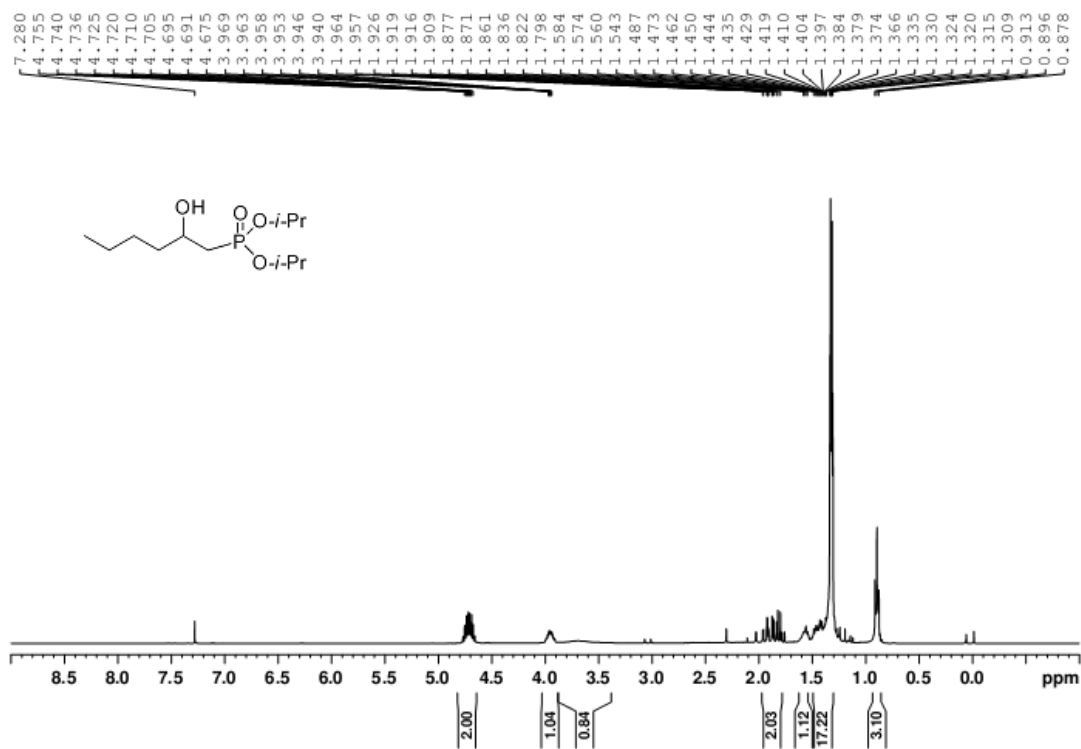

4p

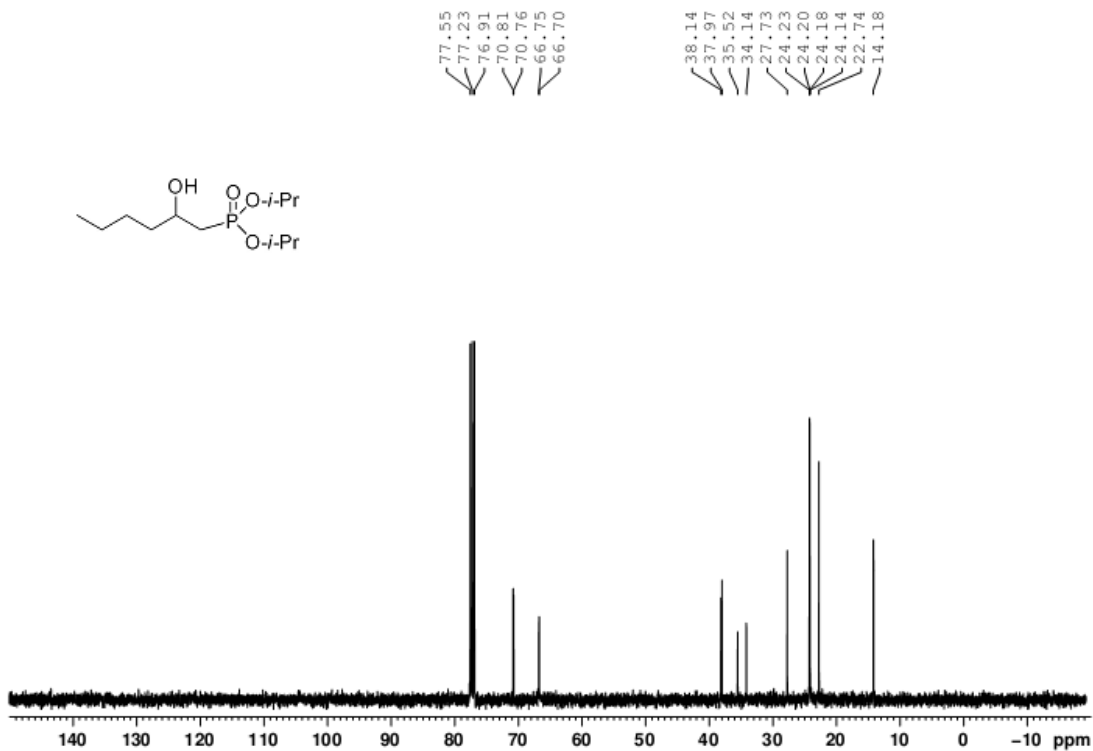

4q

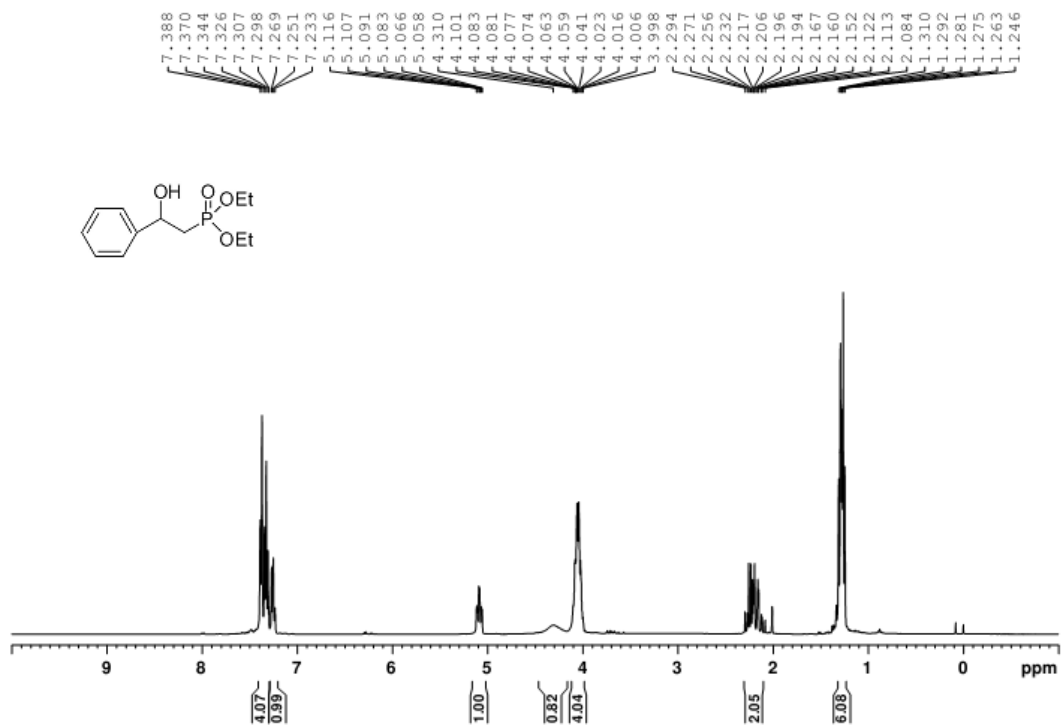

4q

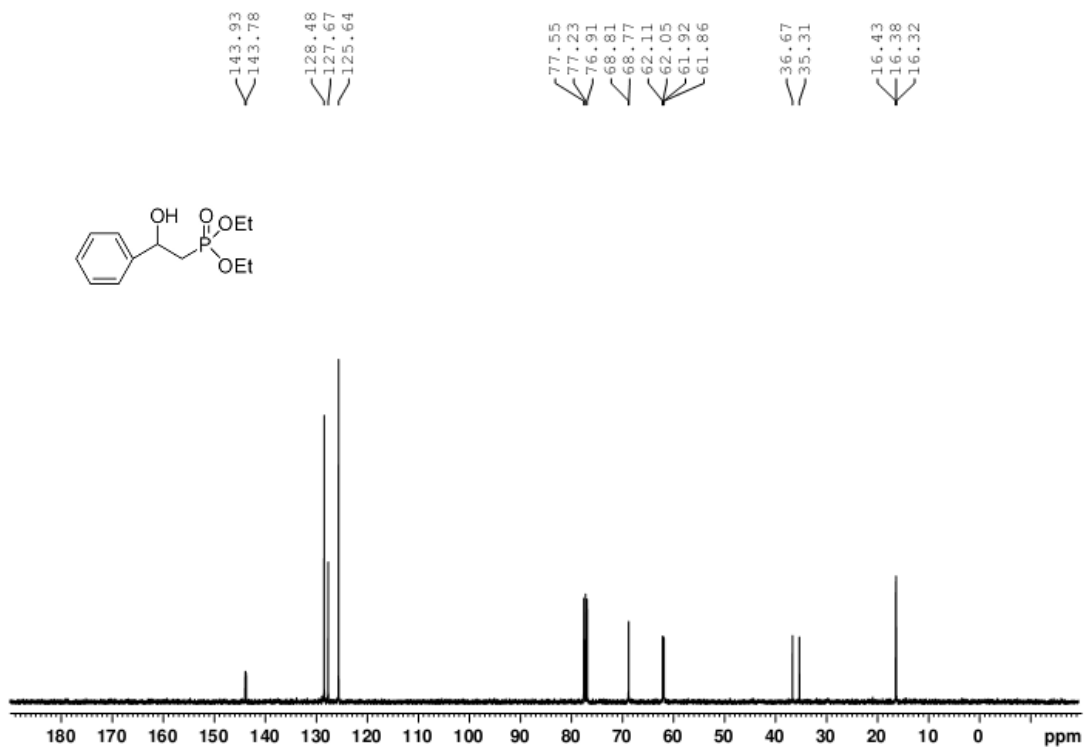

4r

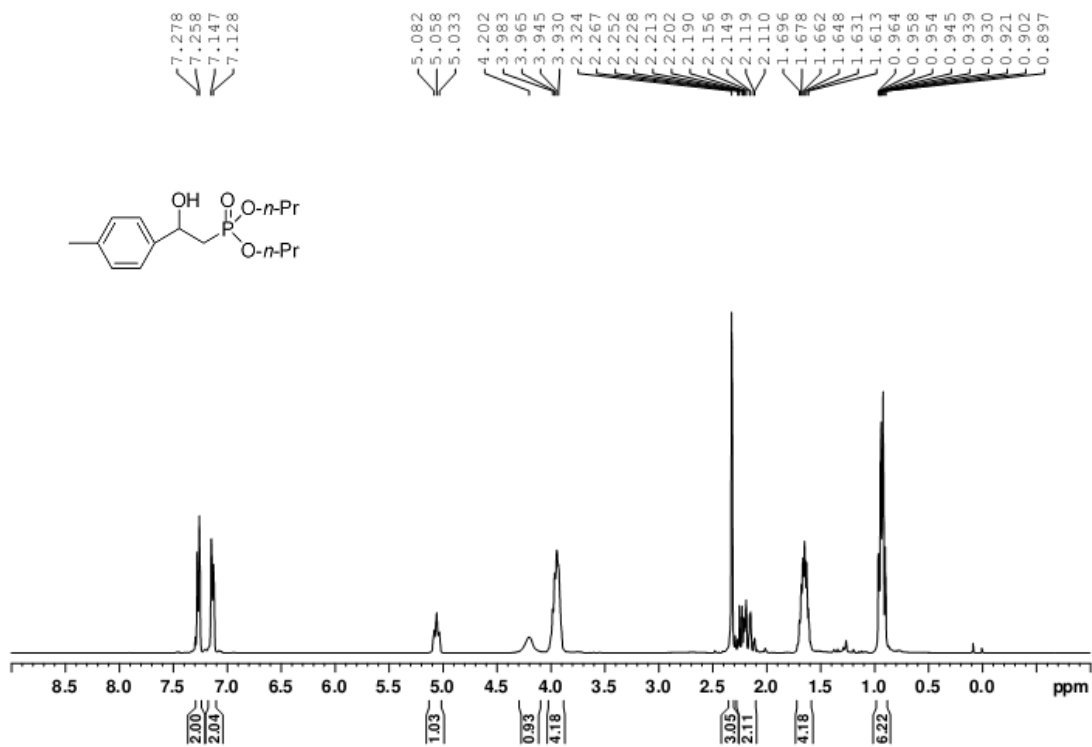

4r

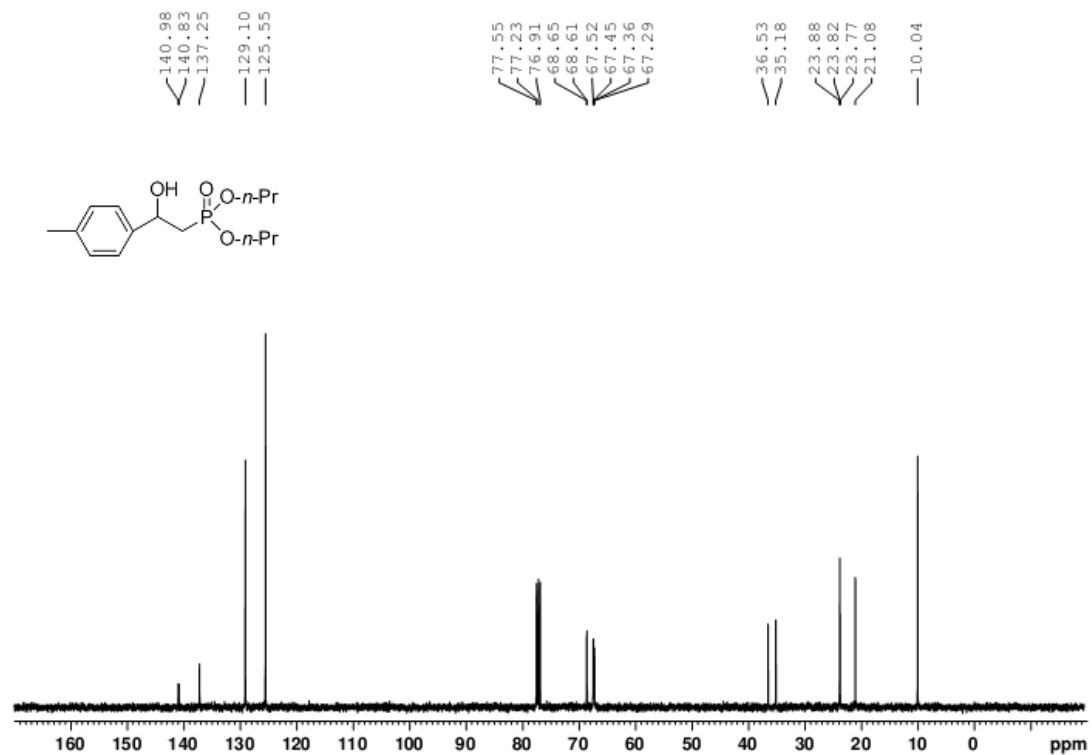

4s

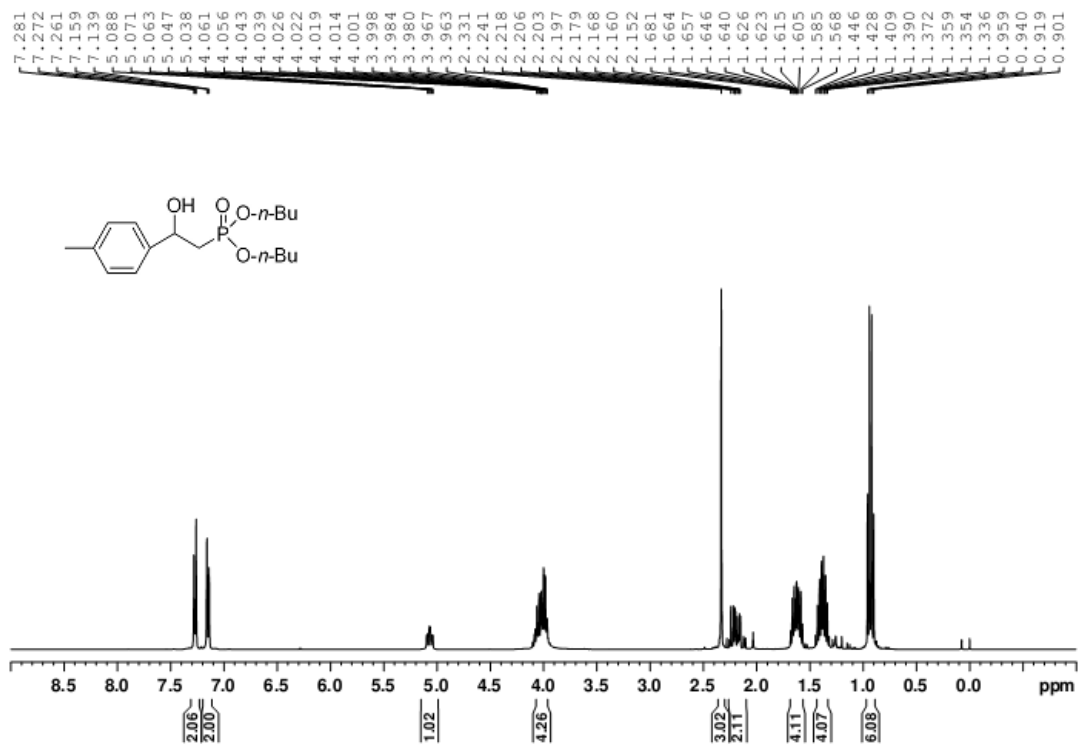

4s

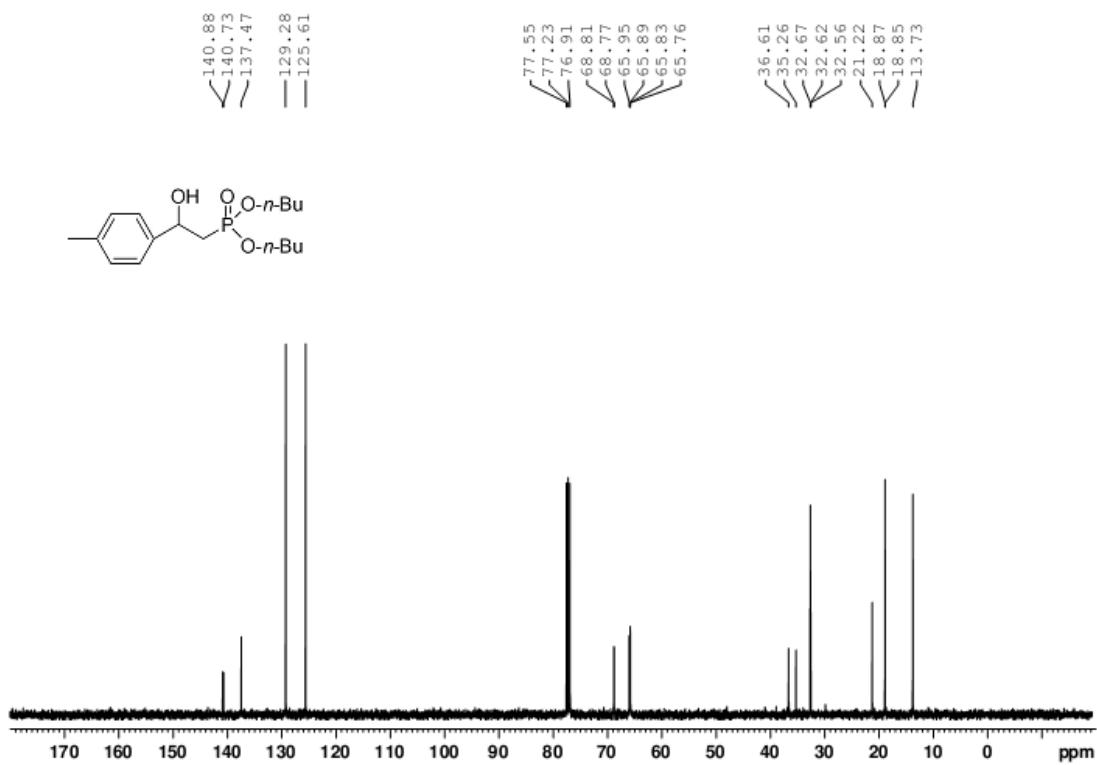



4t

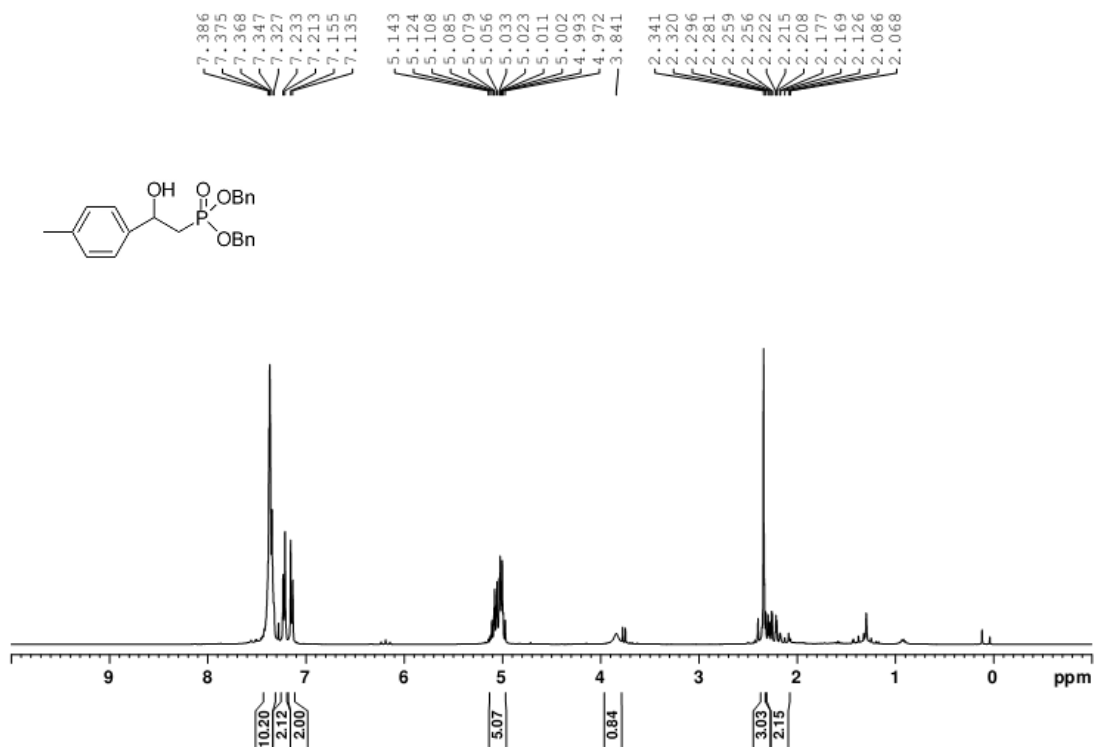

4t

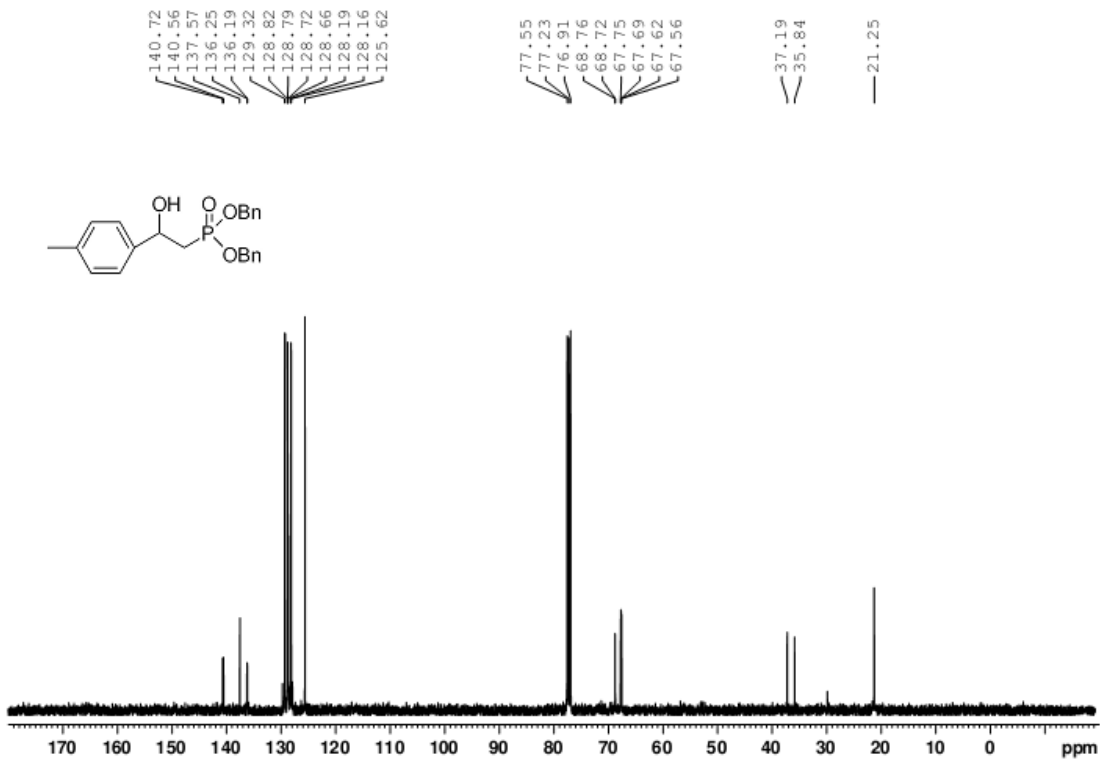

4u

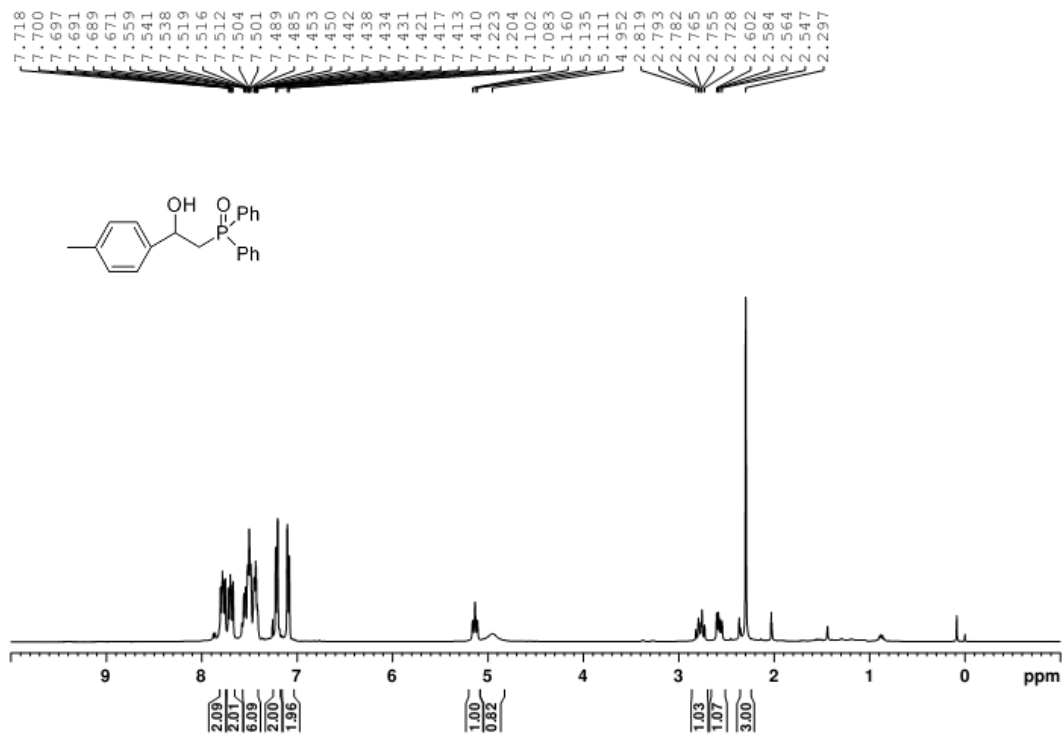

4u

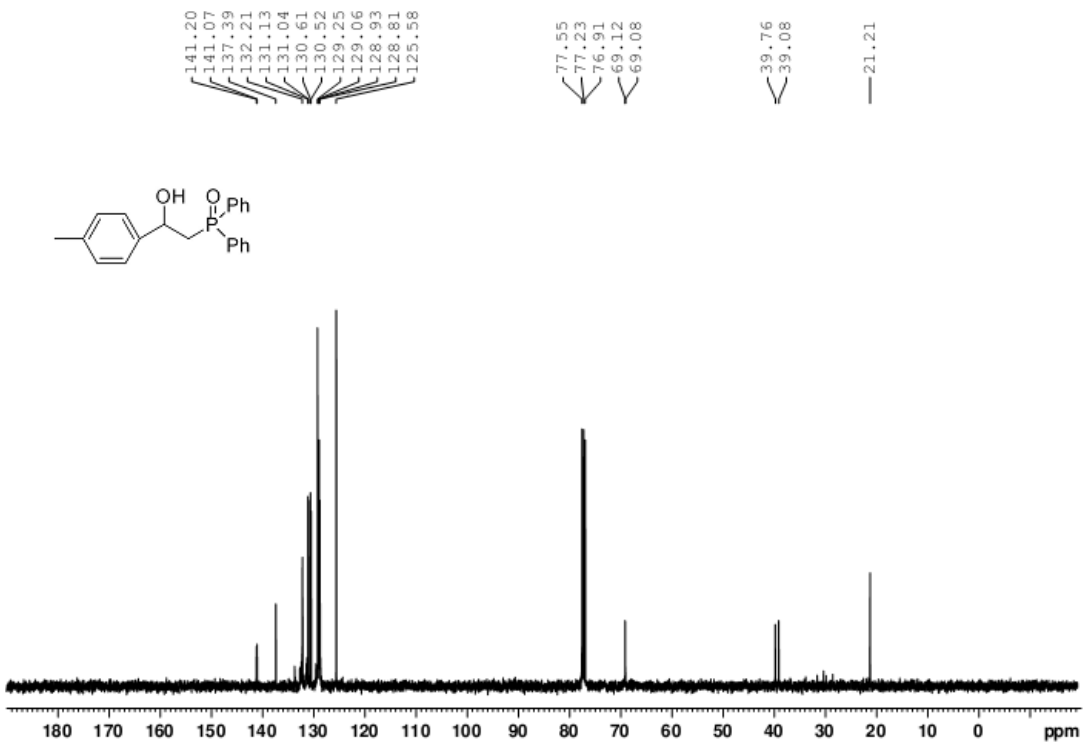

4v

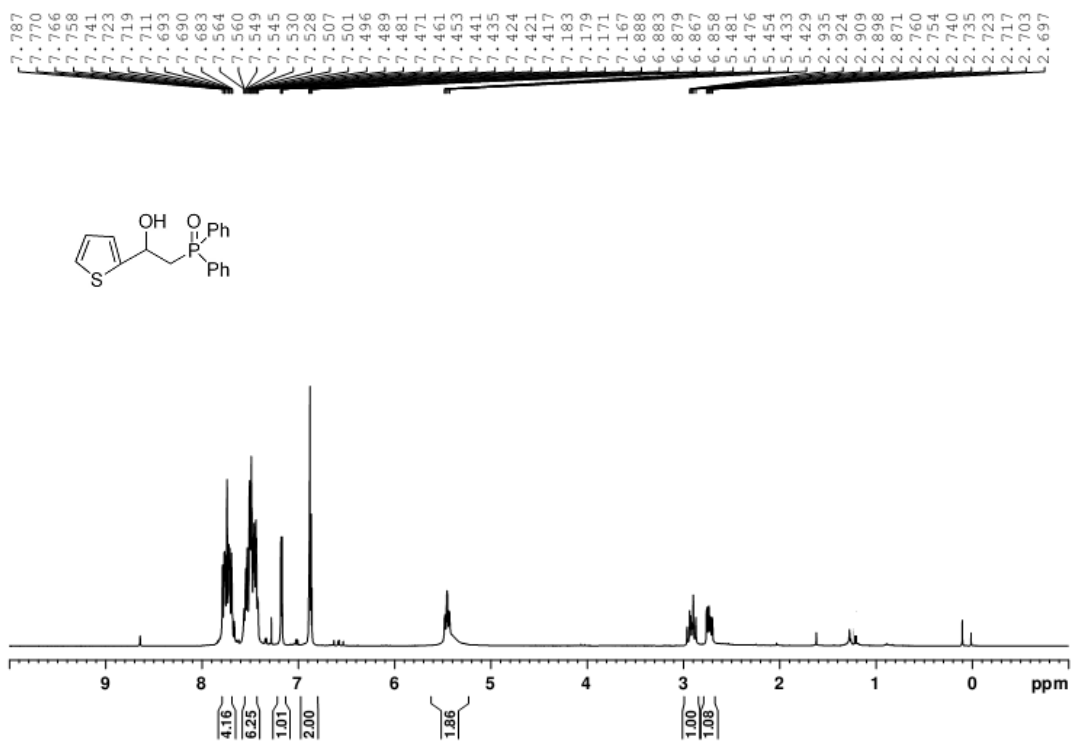

4v

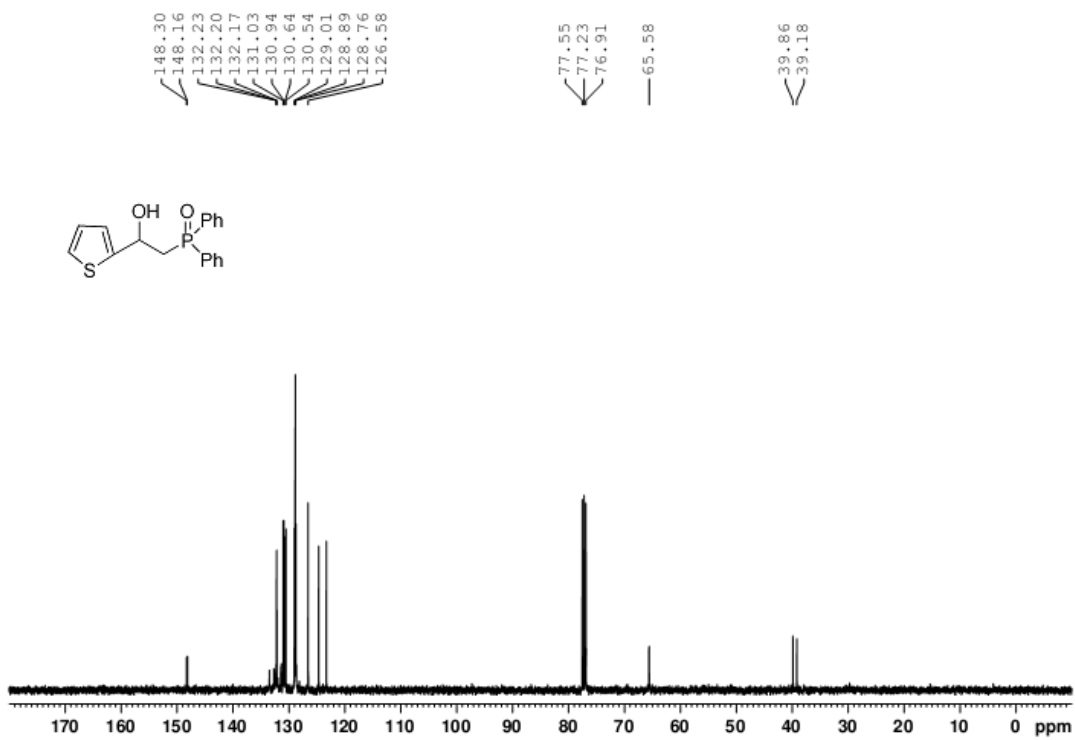

4w

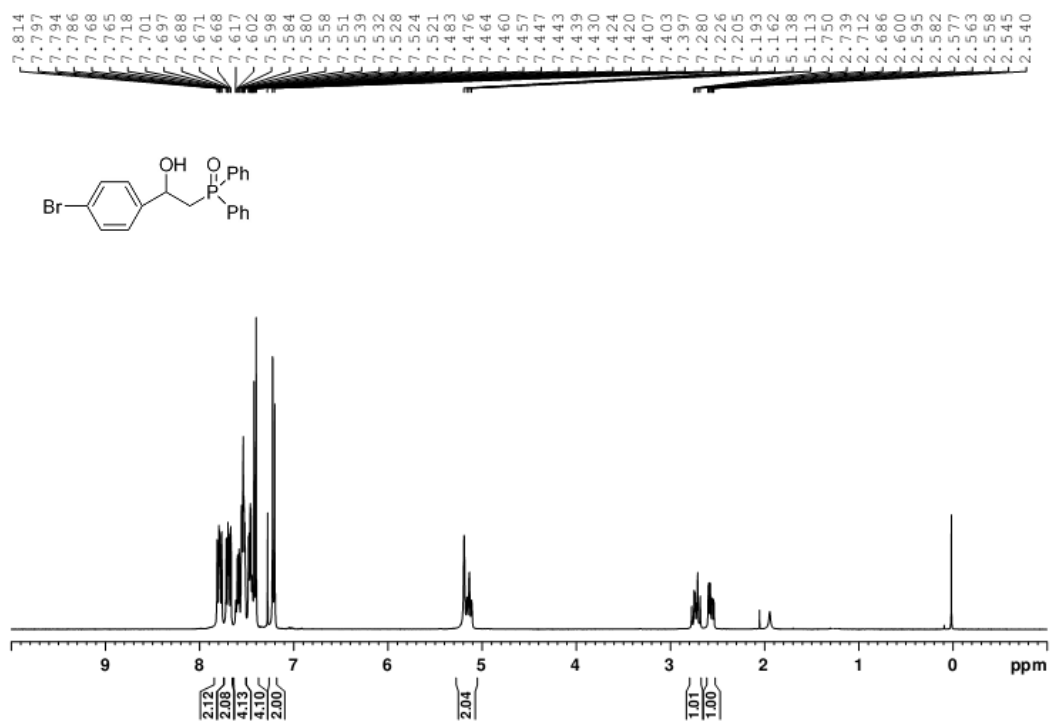

4w

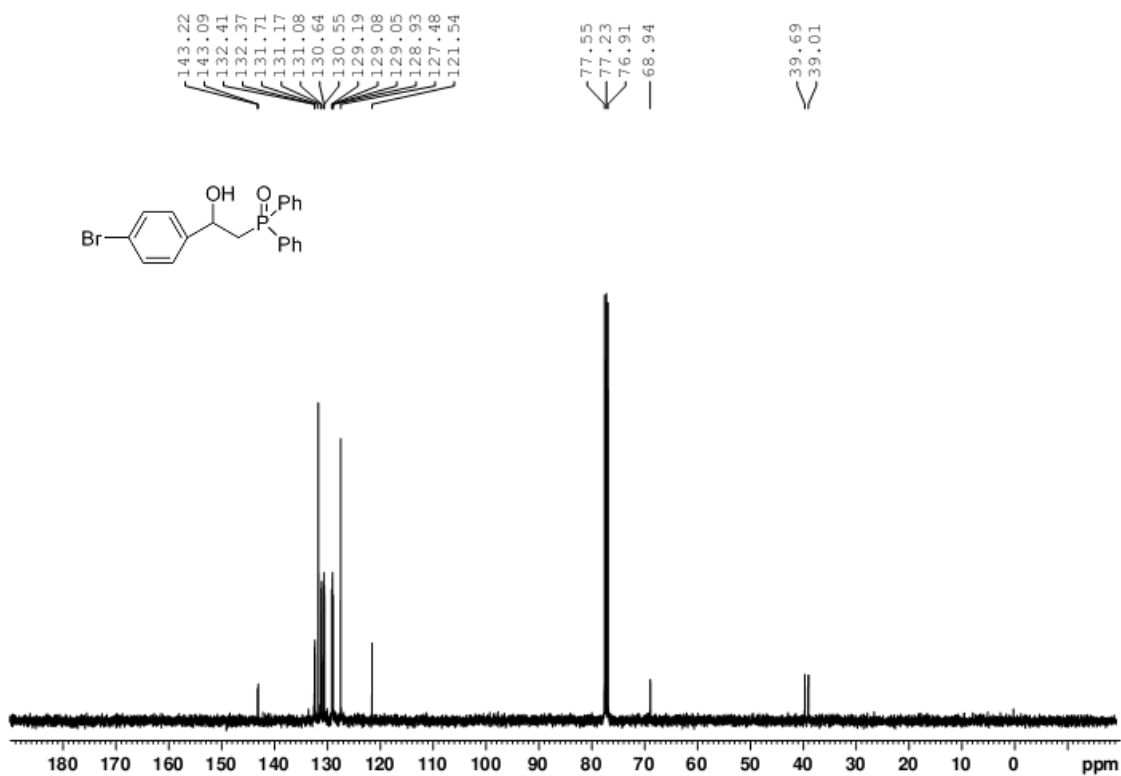

5

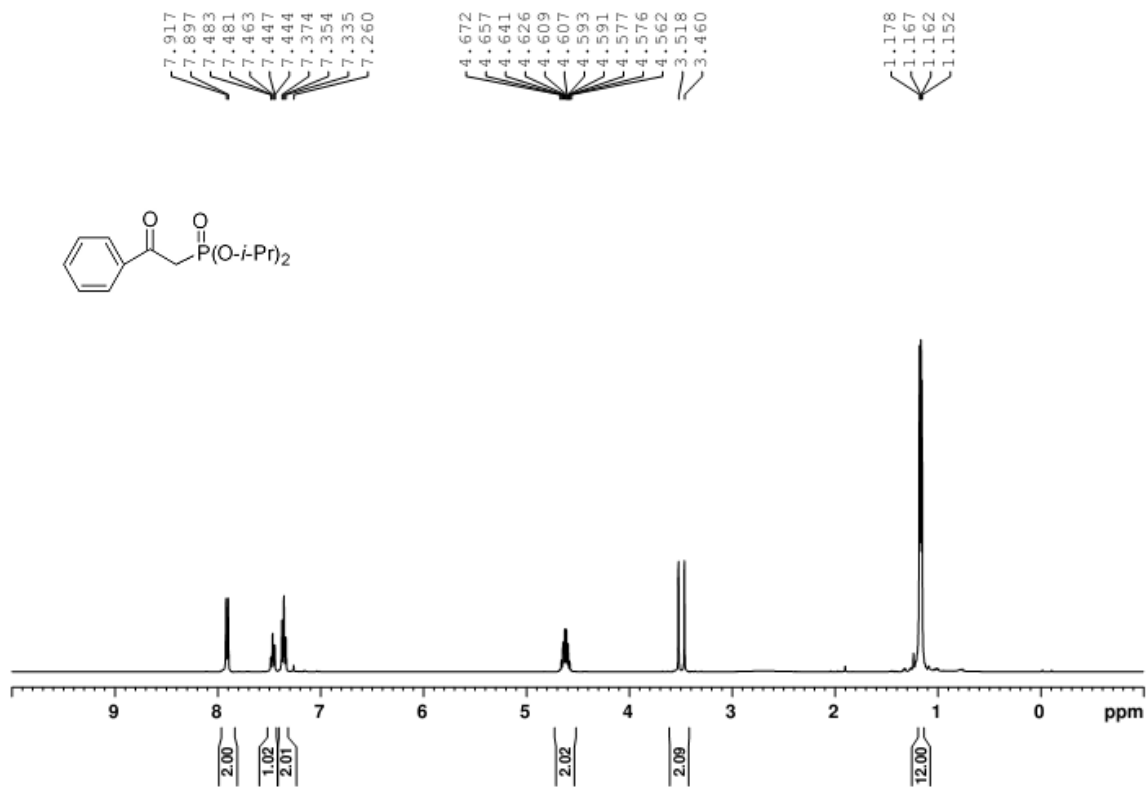

5

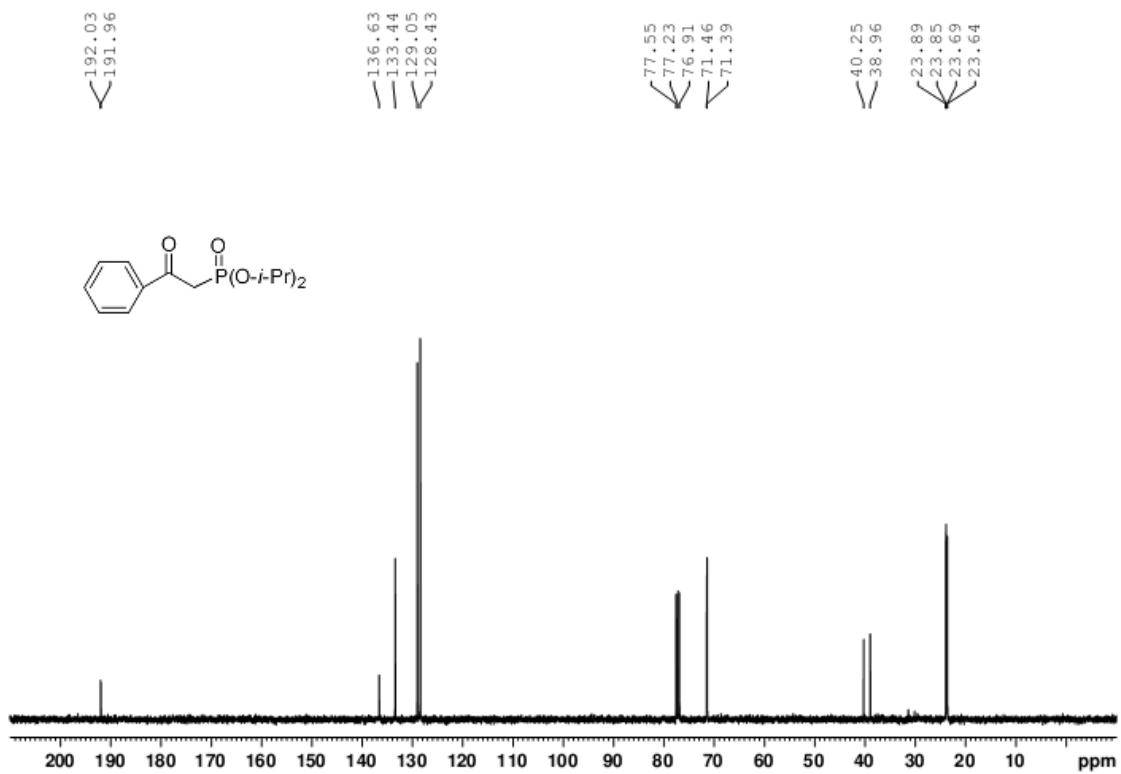

6

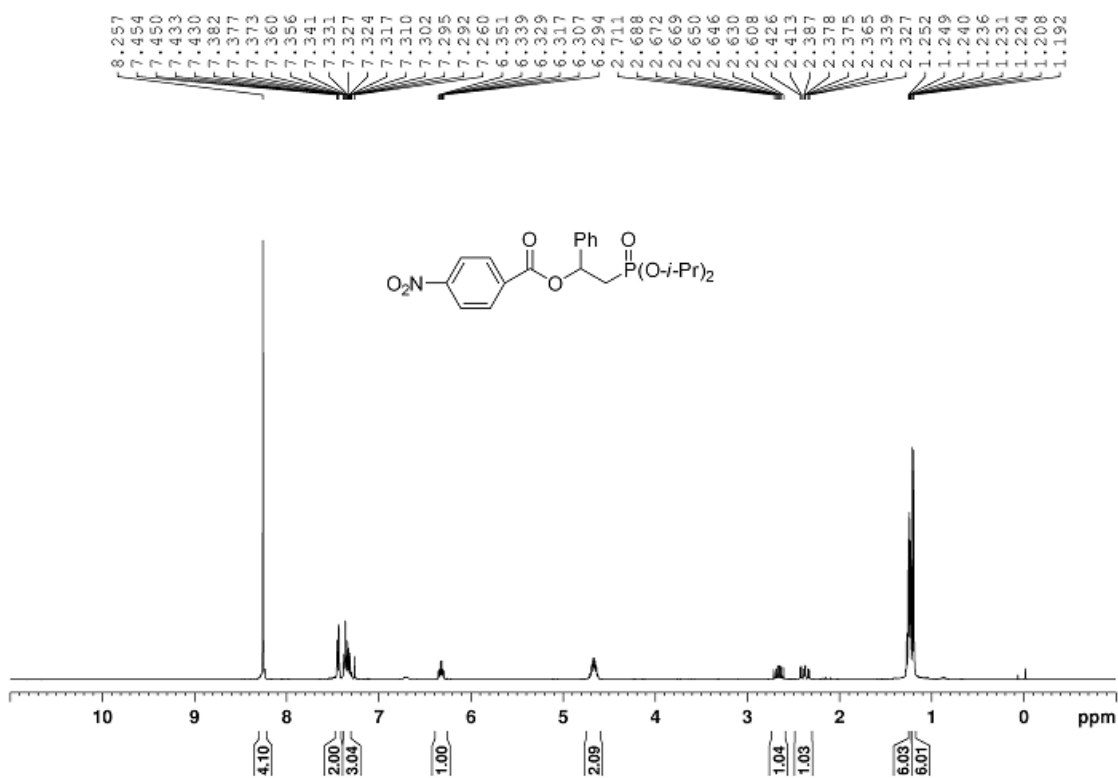

6

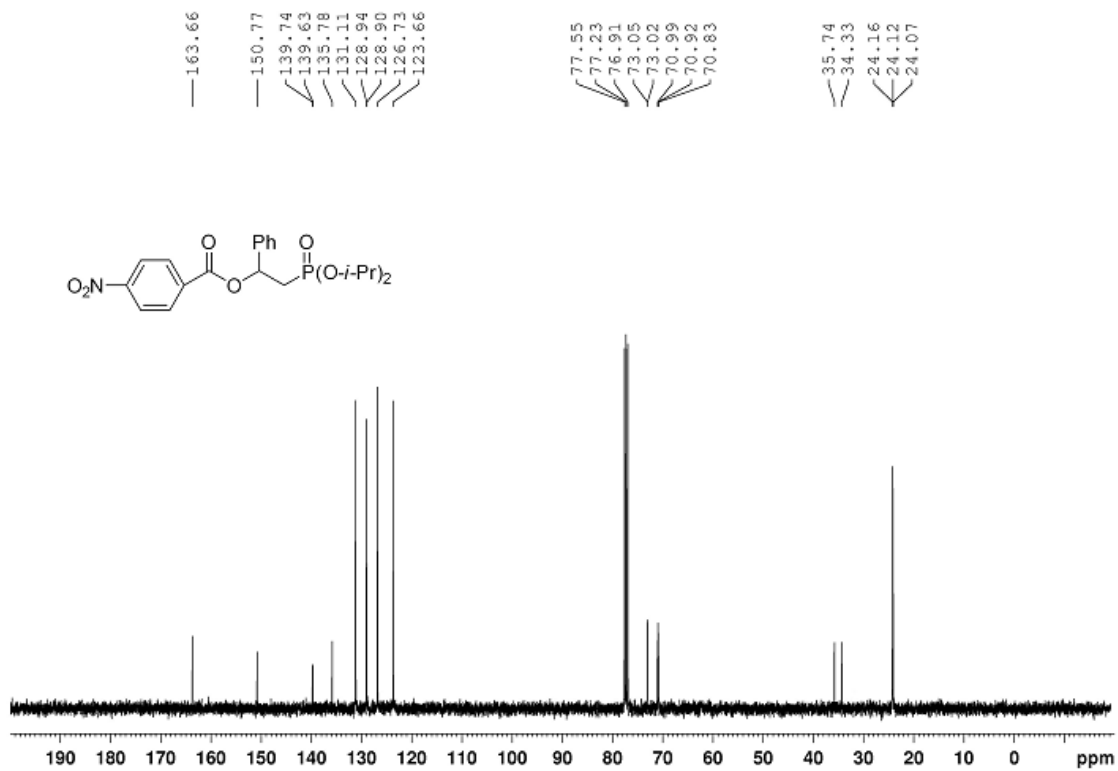

7

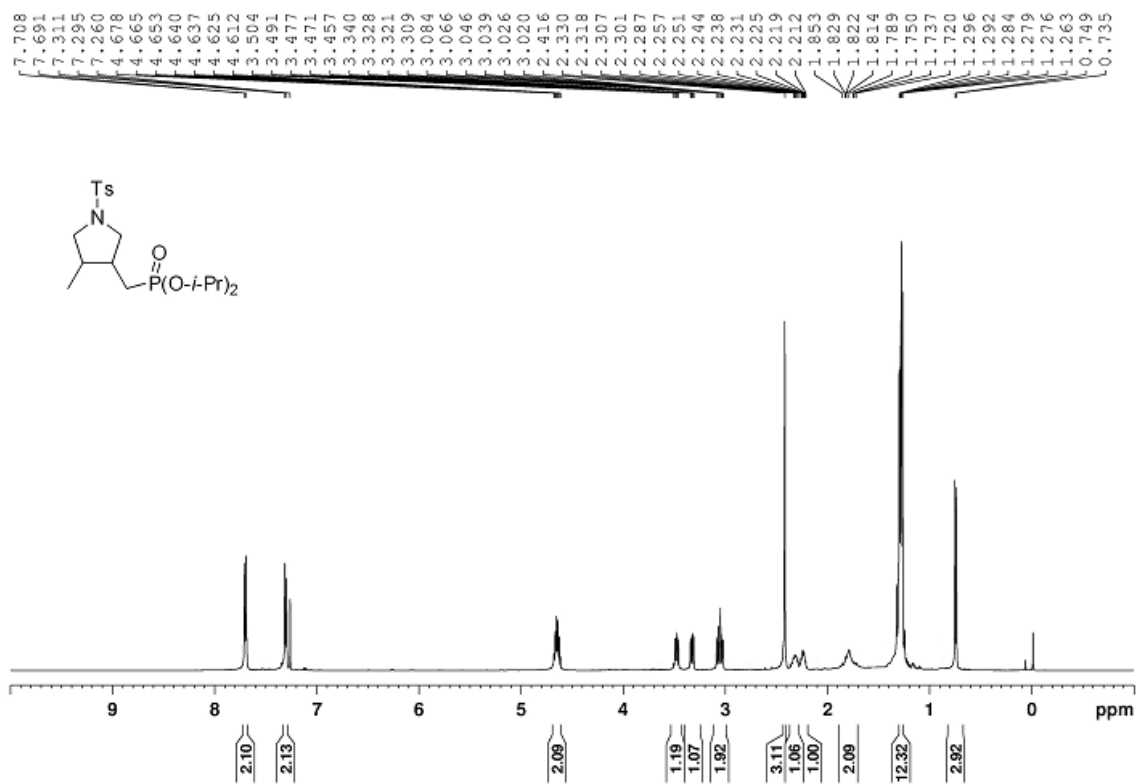

7

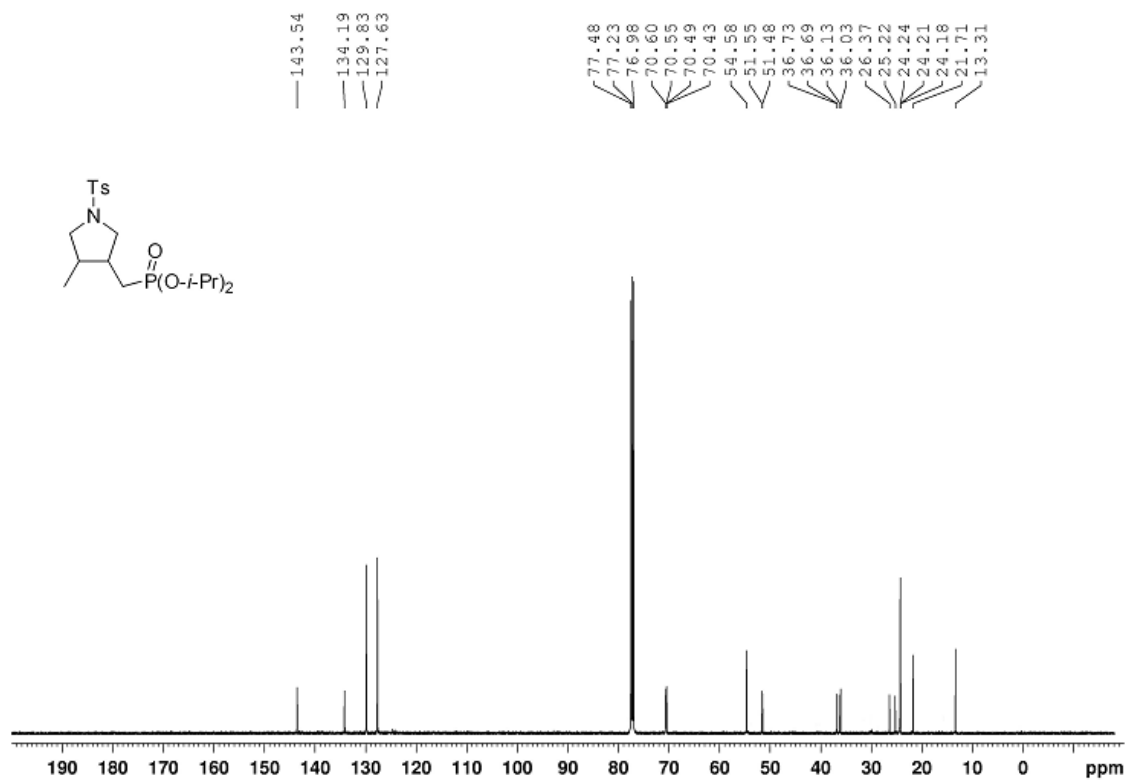

Supplement: c4ra10593a1.pdf [file c4ra10593a1.pdf]
